# Supplementary material for: Inhibitory proteins block substrate access by occupying the active site cleft of Bacillus subtilis intramembrane protease SpoIVFB
Source: bioRxiv preprint, doi:10.1101/2021.07.09.451828, version 5 (2021-11-01)
Supplement: Supplementary File 3 [file 451828_file05.xlsx]

## Sheet: disteval.ca
Applied restraints from co-evolutionary coupling analysis, and distance evaluation, for the model of SpoIVFB in complex with part of Pro-sK
Chain 1	Residue 1	Chain 2	Residue 2	Maximum distance restraint (Å)a	Distance in model between Ca atoms (Å)	Violation (Å)b	Distance in model between Cb atoms (Å)	Violation (Å)c	Distance in model between side chains (Å)	Violation (Å)d	Usede	Note
Within SpoIVFB chain A
PROA	1	PROA	5	8.25	7.87823	0	7.81196	0	8.45462	0.204615	1
PROA	1	PROA	6	11.75	7.94157	0	6.15322	0	4.88603	0	1
PROA	1	PROA	12	12.75	11.3286	0	12.7273	0	12.9322	0.18219	1
PROA	2	PROA	6	8.75	6.98774	0	6.98675	0	8.96434	0.214344	1
PROA	2	PROA	12	9.25	9.42918	0.17918	9.56921	0.319212	9.85414	0.60414	1
PROA	2	PROA	13	12.25	9.30931	0	7.32474	0	8.13921	0	1
PROA	3	PROA	7	8.25	7.69846	0	8.03835	0	7.14122	0	1
PROA	3	PROA	10	7.75	8.14875	0.398748	9.65433	1.90433	12.0455	4.29547	1
PROA	3	PROA	11	9.25	6.59732	0	5.29889	0	5.69192	0	1
PROA	3	PROA	12	7.75	6.57512	0	7.43869	0	10.5485	2.79846	1
PROA	4	PROA	8	8.25	8.59018	0.340184	10.5318	2.28182	10.6166	2.36661	1
PROA	4	PROA	9	11.75	9.06893	0	10.8289	0	12.5687	0.818684	1
PROA	4	PROA	10	12.75	5.97284	0	7.10574	0	6.00805	0	1
PROA	4	PROA	11	6.75	5.13247	0	6.52022	0	8.99927	2.24927	1
PROA	4	PROA	12	9.75	4.45939	0	4.6907	0	6.70103	0	1
PROA	4	PROA	13	7.25	6.56617	0	6.8534	0	10.2623	3.01234	1
PROA	4	PROA	45	12.75	12.5529	0	13.7112	0.961169	14.2237	1.47375	1
PROA	5	PROA	9	8.25	6.52284	0	8.28636	0.036361	8.68888	0.438881	1
PROA	5	PROA	10	9.25	4.35514	0	5.36596	0	5.44298	0	1
PROA	5	PROA	11	6.25	5.70427	0	7.27196	1.02196	8.52444	2.27443	1
PROA	5	PROA	12	12.75	7.18568	0	8.52646	0	10.1165	0	1
PROA	5	PROA	45	11.75	12.088	0.337992	13.1342	1.38416	12.3911	0.641082	1
PROA	6	PROA	10	7.75	6.81113	0	9.19772	1.44772	11.5946	3.84464	1
PROA	6	PROA	11	11.75	7.09244	0	7.33422	0	8.34469	0	1
PROA	7	PROA	11	12.25	7.73057	0	6.19914	0	5.12378	0	1
PROA	7	PROA	45	11.75	8.01713	0	6.14023	0	5.21498	0	1
PROA	7	PROA	48	10.75	8.35397	0	5.91893	0	4.9367	0	1
PROA	7	PROA	49	8.75	7.65906	0	6.74196	0	7.01858	0	1
PROA	7	PROA	52	7.75	8.31578	0.565777	6.16589	0	6.40952	0	1
PROA	7	PROA	58	11.25	10.065	0	8.46296	0	7.42213	0	1
PROA	8	PROA	48	10.75	9.55433	0	9.90283	0	10.3694	0	1
PROA	8	PROA	49	11.75	9.65309	0	11.3657	0	11.4847	0	1
PROA	8	PROA	52	10.75	8.31886	0	7.53425	0	7.16804	0	1
PROA	8	PROA	58	12.25	8.50957	0	9.41269	0	10.5351	0	1
PROA	8	PROA	59	10.75	9.18522	0	11.153	0.402971	14.1007	3.35072	1
PROA	9	PROA	44	11.25	10.9598	0	9.57144	0	11.1172	0	1
PROA	9	PROA	45	8.75	9.71477	0.964768	8.97425	0.224253	8.58552	0	1
PROA	9	PROA	48	6.75	7.40074	0.650743	4.98169	0	4.8443	0	1
PROA	9	PROA	49	10.75	8.84669	0	8.74289	0	7.84738	0	1
PROA	9	PROA	51	11.75	8.69908	0	6.59679	0	5.66315	0	1
PROA	9	PROA	52	11.25	7.41001	0	5.83209	0	4.7262	0	1
PROA	9	PROA	58	8.25	4.92939	0	3.85144	0	4.5891	0	1
PROA	9	PROA	59	8.25	5.77561	0	7.53697	0	10.3801	2.13009	1
PROA	9	PROA	60	9.25	6.72099	0	8.18746	0	10.0268	0.776822	1
PROA	9	PROA	61	7.75	7.84864	0.098637	6.66315	0	7.64109	0	1
PROA	10	PROA	48	11.25	9.70277	0	9.51298	0	11.6872	0.437191	1
PROA	10	PROA	59	8.75	6.1826	0	6.67032	0	9.20311	0.453111	1
PROA	10	PROA	60	6.75	5.62498	0	6.27609	0	4.3531	0	1
PROA	10	PROA	61	9.25	6.58133	0	7.31316	0	9.06547	0	1
PROA	11	PROA	41	8.75	9.83228	1.08228	8.76008	0.010082	7.44104	0	1
PROA	11	PROA	44	7.75	8.4948	0.744798	6.38492	0	5.48431	0	1
PROA	11	PROA	45	9.75	9.05706	0	7.96096	0	6.31458	0	1
PROA	11	PROA	48	10.25	8.93435	0	6.72056	0	6.77226	0	1
PROA	11	PROA	60	9.75	5.8932	0	8.1224	0	9.97775	0.227745	1
PROA	11	PROA	61	6.75	4.45596	0	4.22802	0	4.72245	0	1
PROA	11	PROA	62	9.75	6.11354	0	8.16478	0	8.79076	0	1
PROA	11	PROA	63	8.75	7.56099	0	7.22228	0	7.5976	0	1
PROA	12	PROA	60	8.75	7.81144	0	7.49909	0	9.00108	0.251078	1
PROA	12	PROA	61	9.25	6.11441	0	6.81508	0	9.50154	0.251536	1
PROA	12	PROA	62	6.75	5.25181	0	5.67015	0	6.54741	0	1
PROA	12	PROA	63	9.25	5.87516	0	6.60251	0	8.76607	0	1
PROA	13	PROA	17	10.75	8.01924	0	6.32037	0	5.57744	0	1
PROA	13	PROA	18	8.25	9.29182	1.04182	8.17397	0	5.90388	0	1
PROA	13	PROA	37	11.75	11.2981	0	9.67595	0	8.55202	0	1
PROA	13	PROA	40	11.25	10.949	0	9.26563	0	8.14483	0	1
PROA	13	PROA	41	11.75	10.0722	0	9.13654	0	7.42319	0	1
PROA	13	PROA	44	11.75	11.2483	0	9.6817	0	7.72133	0	1
PROA	13	PROA	62	9.75	6.52319	0	8.47863	0	9.80246	0.052457	1
PROA	13	PROA	63	7.25	4.88468	0	4.62387	0	4.75725	0	1
PROA	13	PROA	64	9.75	7.17302	0	9.31132	0	9.28819	0	1
PROA	13	PROA	65	11.75	9.35465	0	10.7334	0	10.3427	0	1
PROA	14	PROA	18	8.75	7.96907	0	7.92718	0	9.3819	0.631903	1
PROA	14	PROA	40	11.25	13.0552	1.80522	11.602	0.352027	11.9767	0.726713	1
PROA	14	PROA	62	8.25	7.49022	0	6.70513	0	6.05391	0	1
PROA	14	PROA	63	8.75	5.8886	0	5.91034	0	7.34234	0	1
PROA	14	PROA	64	7.25	5.91327	0	5.8566	0	4.74444	0	1
PROA	14	PROA	65	9.25	7.48187	0	6.88969	0	7.11559	0	1
PROA	14	PROA	66	11.25	10.3307	0	9.7428	0	11.2148	0	1
PROA	14	PROA	67	11.75	11.7327	0	10.6884	0	10.8249	0	1
PROA	14	PROA	68	11.25	10.247	0	9.40581	0	9.1318	0	1
PROA	15	PROA	19	8.25	7.16511	0	7.79479	0	8.1659	0	1
PROA	15	PROA	64	10.75	8.43313	0	11.0255	0.275473	10.0824	0	1
PROA	15	PROA	65	12.25	8.21146	0	9.60748	0	9.27728	0	1
PROA	16	PROA	20	8.25	6.9549	0	7.30607	0	9.0858	0.835797	1
PROA	16	PROA	64	10.25	6.42779	0	6.39112	0	7.56195	0	1
PROA	16	PROA	65	6.25	4.93612	0	3.92779	0	5.33187	0	1
PROA	16	PROA	66	10.75	8.56538	0	8.1699	0	9.34989	0	1
PROA	17	PROA	21	8.25	5.83288	0	5.9553	0	5.7475	0	1
PROA	17	PROA	36	10.75	10.9068	0.156786	9.87427	0	7.73281	0	1
PROA	17	PROA	37	9.25	9.54702	0.297015	8.48243	0	6.03618	0	1
PROA	17	PROA	40	9.25	10.6661	1.41608	8.31243	0	6.57674	0	1
PROA	17	PROA	63	10.75	7.39255	0	5.88592	0	4.44211	0	1
PROA	17	PROA	64	7.75	5.81921	0	6.88449	0	8.18828	0.438277	1
PROA	17	PROA	65	8.25	3.5973	0	5.29564	0	6.65662	0	1
PROA	17	PROA	66	11.25	6.81709	0	8.4927	0	9.67868	0	1
PROA	18	PROA	22	8.25	6.09983	0	6.91158	0	9.69113	1.44113	1
PROA	19	PROA	23	8.25	7.20801	0	8.00254	0	8.01949	0	1
PROA	19	PROA	65	11.75	7.31663	0	6.10896	0	7.11708	0	1
PROA	20	PROA	24	8.25	7.13254	0	7.77157	0	8.41707	0.167068	1
PROA	20	PROA	33	10.25	9.99243	0	9.73069	0	9.63102	0	1
PROA	20	PROA	36	9.75	11.0581	1.30808	9.10952	0	8.74391	0	1
PROA	20	PROA	37	10.75	11.2376	0.487566	10.6297	0	10.3332	0	1
PROA	20	PROA	40	10.75	13.3006	2.55064	10.9671	0.217121	11.4673	0.717326	1
PROA	20	PROA	64	11.75	9.96453	0	9.60336	0	10.6424	0	1
PROA	20	PROA	65	8.75	6.30909	0	5.02628	0	5.90778	0	1
PROA	20	PROA	66	11.75	8.44081	0	7.80034	0	6.17793	0	1
PROA	21	PROA	25	8.25	6.42326	0	6.41136	0	5.72377	0	1
PROA	21	PROA	30	12.25	9.13774	0	10.1087	0	10.7253	0	1
PROA	21	PROA	33	7.75	6.68233	0	5.5743	0	4.20243	0	1
PROA	21	PROA	36	10.75	8.72462	0	7.42333	0	6.9711	0	1
PROA	21	PROA	37	9.25	8.63736	0	7.03734	0	5.63235	0	1
PROA	21	PROA	65	11.75	8.33233	0	8.93205	0	9.9217	0	1
PROA	22	PROA	26	8.25	6.14645	0	6.18808	0	5.30957	0	1
PROA	23	PROA	27	8.25	6.88765	0	7.18102	0	8.07709	0	1
PROA	23	PROA	29	10.75	8.46376	0	9.45727	0	12.5999	1.84989	1
PROA	23	PROA	33	10.75	9.03658	0	9.28713	0	10.0229	0	1
PROA	24	PROA	28	10.25	6.9554	0	6.9554	0	6.9554	0	1
PROA	24	PROA	29	6.25	5.33825	0	5.60916	0	7.81149	1.56149	1
PROA	24	PROA	30	9.75	6.75324	0	7.9788	0	8.9757	0	1
PROA	24	PROA	32	6.25	6.83183	0.581833	5.88255	0	5.88255	0	1
PROA	24	PROA	33	6.25	5.70526	0	5.23627	0	5.36303	0	1
PROA	24	PROA	36	8.75	8.92351	0.173513	7.67865	0	7.86885	0	1
PROA	24	PROA	37	11.25	10.5473	0	10.2004	0	9.3471	0	1
PROA	25	PROA	29	9.25	4.61424	0	5.13749	0	7.41013	0	1
PROA	25	PROA	30	7.75	5.23976	0	6.34648	0	6.02131	0	1
PROA	25	PROA	33	8.75	6.72601	0	5.96726	0	4.98846	0	1
PROA	27	PROA	32	10.75	8.90876	0	8.28748	0	8.13417	0	1
PROA	28	PROA	32	11.25	6.68028	0	5.43065	0	5.43065	0	1
PROA	28	PROA	110	11.75	11.6863	0	11.3065	0	10.7957	0	1
PROA	28	PROA	111	10.75	11.3286	0.578569	10.7047	0	11.7116	0.961581	1
PROA	28	PROA	113	10.75	8.85732	0	8.1961	0	6.56153	0	1
PROA	28	PROA	114	11.75	7.22783	0	6.55759	0	6.2711	0	1
PROA	29	PROA	33	8.25	6.3072	0	6.65428	0	9.52867	1.27867	1
PROA	29	PROA	110	12.75	11.6898	0	12.5828	0	11.8344	0	1
PROA	29	PROA	113	11.75	11.2884	0	11.4893	0	9.52142	0	1
PROA	29	PROA	114	11.25	9.14902	0	9.3875	0	9.32998	0	1
PROA	29	PROA	117	11.25	11.0351	0	11.3517	0.101712	11.9233	0.673348	1
PROA	30	PROA	34	8.25	5.88389	0	6.44093	0	8.36132	0.111318	1
PROA	31	PROA	35	8.25	6.14381	0	6.51525	0	8.07155	0	1
PROA	31	PROA	104	13.25	12.9717	0	10.7944	0	9.89233	0	1
PROA	31	PROA	110	10.75	7.96032	0	6.24892	0	5.20516	0	1
PROA	31	PROA	111	10.75	10.2352	0	8.72236	0	6.90321	0	1
PROA	31	PROA	113	11.25	11.4052	0.155213	9.47319	0	9.4749	0	1
PROA	31	PROA	114	7.25	8.94769	1.69769	6.69491	0	7.21797	0	1
PROA	31	PROA	117	11.25	10.3525	0	9.71485	0	11.4711	0.221124	1
PROA	32	PROA	36	8.25	6.25783	0	6.56721	0	7.70371	0	1
PROA	32	PROA	110	11.75	9.32024	0	9.16541	0	8.38856	0	1
PROA	32	PROA	111	11.75	11.1573	0	11.4225	0	12.365	0.615049	1
PROA	32	PROA	113	10.25	10.5626	0.312632	9.83788	0	9.33214	0	1
PROA	32	PROA	114	7.25	7.37702	0.127024	5.52957	0	5.27779	0	1
PROA	32	PROA	117	7.25	7.56249	0.312491	6.30005	0	6.5127	0	1
PROA	32	PROA	118	10.75	8.30656	0	8.1018	0	9.90444	0	1
PROA	32	PROA	121	10.75	11.3656	0.615593	9.8674	0	9.95605	0	1
PROA	33	PROA	37	8.25	5.99447	0	5.92304	0	4.55135	0	1
PROA	33	PROA	65	12.25	13.2536	1.00358	13.764	1.51397	13.4965	1.24652	0	not included during modeling to allow binding of Pro-sK
PROA	34	PROA	38	8.25	5.89905	0	6.05566	0	4.51201	0	1
PROA	35	PROA	39	8.25	6.05686	0	6.24839	0	6.65561	0	1
PROA	35	PROA	97	11.75	10.5804	0	9.36156	0	9.6746	0	1
PROA	35	PROA	101	9.25	9.67497	0.424974	7.8819	0	7.66455	0	1
PROA	35	PROA	104	11.25	11.8645	0.614462	9.33531	0	8.35315	0	1
PROA	35	PROA	110	12.25	10.4226	0	8.07595	0	6.50734	0	1
PROA	35	PROA	114	8.25	10.5406	2.29065	7.82042	0	7.49876	0	1
PROA	35	PROA	115	10.75	11.0654	0.315437	10.0184	0	12.143	1.39301	1
PROA	35	PROA	117	9.75	8.94676	0	7.69585	0	8.9788	0	1
PROA	35	PROA	118	7.25	7.37298	0.122981	4.82639	0	5.70423	0	1
PROA	35	PROA	121	9.75	10.9449	1.19489	9.38498	0	11.6124	1.86235	1
PROA	36	PROA	40	8.25	6.45326	0	6.63809	0	6.2122	0	1
PROA	36	PROA	65	12.25	12.1289	0	12.1309	0	11.5447	0	0	not included during modeling to allow binding of Pro-sK
PROA	36	PROA	66	12.25	11.9068	0	12.3871	0.13708	11.5422	0	0	not included during modeling to allow binding of Pro-sK
PROA	36	PROA	117	10.75	9.49279	0	9.13361	0	11.0249	0.274859	1
PROA	36	PROA	118	9.75	7.70132	0	7.65721	0	8.72467	0	1
PROA	36	PROA	121	8.25	9.66038	1.41038	8.50347	0.253466	10.0841	1.83413	1
PROA	36	PROA	125	10.75	11.7933	1.04333	10.706	0	9.47051	0	1
PROA	37	PROA	41	8.25	6.26293	0	6.49198	0	6.67025	0	1
PROA	37	PROA	63	11.75	10.6159	0	9.53698	0	7.88742	0	0	not included during modeling to allow binding of Pro-sK
PROA	37	PROA	65	12.25	11.3658	0	12.6869	0.436888	12.2042	0	0	not included during modeling to allow binding of Pro-sK
PROA	37	PROA	66	12.75	11.8701	0	13.9514	1.20137	13.9983	1.24834	1
PROA	38	PROA	42	8.25	6.18119	0	6.23425	0	7.05612	0	1
PROA	38	PROA	97	10.25	10.7468	0.496784	9.19234	0	9.68787	0	1
PROA	38	PROA	100	10.75	13.1183	2.36827	10.9451	0.195058	11.6433	0.893307	1
PROA	38	PROA	101	11.75	12.4383	0.688253	11.3171	0	12.0951	0.345118	1
PROA	38	PROA	118	11.75	11.1075	0	9.53145	0	9.49364	0	1
PROA	39	PROA	43	8.25	6.12059	0	6.419	0	5.38402	0	1
PROA	39	PROA	93	10.75	9.54839	0	8.85788	0	9.09596	0	1
PROA	39	PROA	94	9.25	8.87508	0	8.44086	0	7.55586	0	1
PROA	39	PROA	97	8.25	8.37883	0.128826	6.39924	0	5.4833	0	1
PROA	39	PROA	101	10.75	11.157	0.406985	9.4441	0	8.59612	0	1
PROA	39	PROA	118	8.75	9.2075	0.457504	6.90683	0	4.52113	0	1
PROA	39	PROA	121	9.25	11.1664	1.91638	9.35112	0.101124	12.0103	2.76031	1
PROA	39	PROA	122	8.25	9.109	0.859005	6.94242	0	5.97218	0	1
PROA	39	PROA	125	9.25	11.1456	1.89564	8.56788	0	8.57448	0	1
PROA	40	PROA	44	8.25	6.02228	0	6.07249	0	4.81932	0	1
PROA	40	PROA	63	8.25	8.52159	0.271586	6.50229	0	4.67495	0	0	not included during modeling to allow binding of Pro-sK
PROA	40	PROA	64	11.75	10.4258	0	9.86231	0	10.5023	0	0	not included during modeling to allow binding of Pro-sK
PROA	40	PROA	65	12.25	11.0355	0	11.1292	0	11.0159	0	0	not included during modeling to allow binding of Pro-sK
PROA	40	PROA	66	11.75	10.2967	0	10.6283	0	12.2262	0.47622	0	not included during modeling to allow binding of Pro-sK
PROA	40	PROA	67	10.25	8.34188	0	7.64118	0	7.59333	0	0	not included during modeling to allow binding of Pro-sK
PROA	40	PROA	68	7.25	7.67527	0.425273	7.0553	0	6.82062	0	0	not included during modeling to allow binding of Pro-sK
PROA	40	PROA	125	9.75	11.0496	1.29959	10.1534	0.403426	9.94781	0.197808	1
PROA	41	PROA	45	8.25	6.14716	0	6.24449	0	6.52312	0	1
PROA	41	PROA	63	9.25	8.91639	0	8.26914	0	6.93442	0	0	not included during modeling to allow binding of Pro-sK
PROA	41	PROA	68	10.75	9.30161	0	10.5344	0	10.5567	0	0	not included during modeling to allow binding of Pro-sK
PROA	42	PROA	46	8.25	5.69478	0	6.38387	0	6.96086	0	1
PROA	42	PROA	90	11.25	9.31736	0	9.27353	0	9.79097	0	1
PROA	42	PROA	93	7.25	8.36292	1.11292	6.33169	0	6.01972	0	1
PROA	42	PROA	94	10.75	9.52139	0	9.30088	0	8.7409	0	1
PROA	42	PROA	96	10.25	11.5697	1.3197	9.68388	0	10.61	0.360006	1
PROA	42	PROA	97	8.75	9.61346	0.86346	6.91452	0	5.32814	0	1
PROA	42	PROA	122	11.75	12.4739	0.723914	10.7473	0	9.69449	0	1
PROA	43	PROA	47	8.25	6.27377	0	6.69981	0	7.03928	0	1
PROA	43	PROA	68	10.25	9.0308	0	8.53148	0	10.3255	0.07555	0	not included during modeling to allow binding of Pro-sK
PROA	43	PROA	89	11.25	9.00728	0	8.94506	0	9.06645	0	1
PROA	43	PROA	90	7.75	6.47827	0	6.10695	0	5.98265	0	1
PROA	43	PROA	93	7.25	7.25564	0.005638	5.86974	0	5.12196	0	1
PROA	43	PROA	94	9.25	7.92551	0	7.00915	0	3.6681	0	1
PROA	43	PROA	97	10.75	10.0604	0	8.44882	0	6.18142	0	1
PROA	43	PROA	122	10.75	11.0605	0.310522	9.60155	0	6.61344	0	1
PROA	43	PROA	125	9.25	11.0622	1.81221	8.23791	0	7.46493	0	1
PROA	43	PROA	126	11.75	11.8797	0.129658	10.9234	0	9.80429	0	1
PROA	43	PROA	129	9.75	12.3247	2.5747	9.6097	0	9.01691	0	1
PROA	44	PROA	48	8.25	6.10626	0	5.95452	0	7.4298	0	1
PROA	44	PROA	61	7.75	7.62285	0	5.5927	0	5.12897	0	1
PROA	44	PROA	62	11.75	9.13983	0	9.54978	0	9.84833	0	1
PROA	44	PROA	63	8.25	8.61854	0.368542	6.74998	0	4.74357	0	1
PROA	44	PROA	67	11.25	9.96731	0	9.63695	0	8.43629	0	0	not included during modeling to allow binding of Pro-sK
PROA	44	PROA	68	7.25	7.37134	0.121339	6.84311	0	5.58499	0	1
PROA	44	PROA	69	10.75	8.6758	0	9.39074	0	8.94411	0	1
PROA	44	PROA	70	8.75	8.36979	0	7.59075	0	8.17623	0	1
PROA	45	PROA	49	8.25	4.91857	0	4.74592	0	5.65425	0	1
PROA	45	PROA	61	9.75	9.46267	0	8.8781	0	8.20865	0	1
PROA	45	PROA	93	10.25	10.7139	0.463853	9.60934	0	9.30781	0	1
PROA	46	PROA	50	8.25	6.16311	0	6.00654	0	5.60971	0	1
PROA	46	PROA	86	10.25	7.88165	0	8.0365	0	7.73205	0	1
PROA	46	PROA	89	6.25	6.72549	0.475492	5.60109	0	5.60109	0	1
PROA	46	PROA	90	6.75	6.43092	0	6.43092	0	6.43092	0	1
PROA	46	PROA	91	10.75	9.92529	0	11.0969	0.346894	10.3535	0	1
PROA	46	PROA	92	10.25	9.89558	0	9.67867	0	10.6848	0.434776	1
PROA	46	PROA	93	6.75	7.65861	0.908609	6.19332	0	4.36255	0	1
PROA	46	PROA	94	11.25	10.1181	0	10.6166	0	9.23563	0	1
PROA	47	PROA	51	8.25	6.34971	0	6.58957	0	8.56121	0.31121	1
PROA	47	PROA	58	9.75	9.69286	0	8.32238	0	9.49664	0	1
PROA	47	PROA	61	10.25	9.97821	0	8.41564	0	9.446	0	1
PROA	47	PROA	68	10.25	11.1353	0.885344	10.0645	0	10.1566	0	1
PROA	47	PROA	70	7.25	9.05049	1.80049	6.39064	0	7.28036	0.030355	1
PROA	47	PROA	72	11.25	8.87707	0	7.89904	0	8.84989	0	1
PROA	47	PROA	86	7.75	5.73725	0	5.45124	0	5.79811	0	1
PROA	47	PROA	87	11.75	7.11872	0	7.76345	0	7.72769	0	1
PROA	47	PROA	89	7.25	6.81619	0	6.45377	0	5.62022	0	1
PROA	47	PROA	90	8.75	6.35768	0	6.18263	0	4.15913	0	1
PROA	47	PROA	129	12.75	13.3811	0.631051	11.0243	0	9.21301	0	1
PROA	48	PROA	52	8.25	6.27035	0	6.48736	0	6.83555	0	1
PROA	48	PROA	58	7.25	6.74717	0	5.10973	0	4.57784	0	1
PROA	48	PROA	60	11.75	9.44204	0	9.91166	0	11.7948	0.044763	1
PROA	48	PROA	61	7.25	8.2643	1.0143	5.84381	0	5.41646	0	1
PROA	48	PROA	70	7.25	8.79257	1.54257	7.20816	0	7.07561	0	1
PROA	48	PROA	72	11.25	7.59564	0	8.20123	0	7.97523	0	1
PROA	49	PROA	53	8.25	6.17463	0	6.3	0	4.56442	0	1
PROA	49	PROA	89	10.25	9.9687	0	8.22159	0	8.22159	0	1
PROA	50	PROA	54	8.25	6.84142	0	6.97497	0	6.62472	0	1
PROA	50	PROA	56	10.75	8.73965	0	8.47371	0	9.43699	0	1
PROA	50	PROA	82	10.75	8.4773	0	7.93684	0	9.81287	0	1
PROA	50	PROA	85	6.75	7.74565	0.995646	5.90109	0	5.94574	0	1
PROA	50	PROA	86	6.75	5.65886	0	4.4487	0	4.99014	0	1
PROA	50	PROA	88	10.25	10.2663	0.016284	9.32524	0	8.67477	0	1
PROA	50	PROA	89	6.75	8.00436	1.25436	5.23836	0	4.32386	0	1
PROA	50	PROA	90	10.75	9.85667	0	8.76262	0	8.20476	0	1
PROA	51	PROA	55	10.25	7.3315	0	9.02844	0	8.8656	0	1
PROA	51	PROA	56	6.25	5.3142	0	3.99666	0	4.97385	0	1
PROA	51	PROA	57	9.75	6.76335	0	7.59377	0	9.14599	0	1
PROA	51	PROA	58	7.25	6.6723	0	4.89583	0	4.50047	0	1
PROA	51	PROA	61	11.25	11.566	0.315968	9.55395	0	9.17244	0	1
PROA	51	PROA	70	9.75	11.2855	1.53554	8.70405	0	8.26802	0	1
PROA	51	PROA	72	7.25	7.85569	0.605685	6.1798	0	5.89986	0	1
PROA	51	PROA	73	11.25	8.35687	0	6.25945	0	6.42252	0	1
PROA	51	PROA	78	11.75	10.4682	0	8.8724	0	9.16678	0	1
PROA	51	PROA	82	9.25	8.04232	0	8.00738	0	8.51094	0	1
PROA	51	PROA	85	10.75	9.17606	0	9.42485	0	9.42485	0	1
PROA	51	PROA	86	8.75	6.82555	0	5.96165	0	5.40618	0	1
PROA	51	PROA	89	11.25	10.6473	0	9.89009	0	9.89009	0	1
PROA	52	PROA	56	9.25	5.8711	0	7.16346	0	9.84371	0.593715	1
PROA	52	PROA	57	9.25	6.40717	0	8.04463	0	8.44134	0	1
PROA	52	PROA	58	8.75	7.43505	0	7.46304	0	8.15976	0	1
PROA	52	PROA	215	8.25	19.009	10.759	21.0752	12.8252	22.3273	14.0773	0	may be satisfied in dimer only structure with CBS domains not tilted to form tetramer
PROA	53	PROA	85	10.25	10.8979	0.647866	8.7335	0	9.97052	0	1
PROA	53	PROA	214	7.75	19.3526	11.6026	18.9678	11.2178	18.9744	11.2244	0	may be satisfied in dimer only structure with CBS domains not tilted to form tetramer
PROA	54	PROA	78	10.25	9.4651	0	7.23182	0	9.41454	0	1
PROA	54	PROA	79	11.25	9.97231	0	8.23624	0	8.34646	0	1
PROA	54	PROA	81	10.75	10.9292	0.179211	9.72996	0	10.5099	0	1
PROA	54	PROA	82	8.25	7.58796	0	4.89278	0	4.18551	0	1
PROA	54	PROA	85	8.25	10.2816	2.0316	7.75589	0	5.71177	0	1
PROA	54	PROA	86	10.75	9.98225	0	8.20362	0	7.22188	0	1
PROA	55	PROA	74	11.25	10.465	0	9.40083	0	9.18705	0	1
PROA	55	PROA	75	11.25	10.5888	0	11.4523	0.202266	11.1649	0	1
PROA	55	PROA	76	11.25	11.7524	0.502382	11.0405	0	10.6045	0	1
PROA	55	PROA	77	11.75	11.0446	0	10.7928	0	10.6986	0	1
PROA	55	PROA	78	11.75	7.94127	0	6.3656	0	3.84271	0	1
PROA	56	PROA	72	7.25	8.12552	0.875525	6.6977	0	6.26079	0	1
PROA	56	PROA	73	10.25	6.15046	0	4.25444	0	3.73344	0	1
PROA	56	PROA	74	8.25	7.54085	0	7.36766	0	9.33212	1.08212	1
PROA	56	PROA	75	8.25	7.90528	0	8.03027	0	6.53114	0	1
PROA	56	PROA	76	10.75	9.9839	0	10.0476	0	9.47433	0	1
PROA	56	PROA	77	11.75	10.0336	0	11.3029	0	10.3908	0	1
PROA	56	PROA	78	8.75	7.24948	0	5.63847	0	5.53922	0	1
PROA	56	PROA	82	8.25	8.90105	0.65105	6.82203	0	5.05563	0	1
PROA	56	PROA	85	11.25	12.2637	1.01371	10.4275	0	8.46415	0	1
PROA	56	PROA	86	9.25	10.7837	1.53371	8.12393	0	6.19483	0	1
PROA	57	PROA	72	8.75	7.26645	0	8.78866	0.038662	11.786	3.03603	1
PROA	57	PROA	73	6.25	5.18231	0	5.4638	0	8.48598	2.23598	1
PROA	57	PROA	74	10.25	6.96944	0	6.49062	0	8.34634	0	1
PROA	57	PROA	75	10.75	8.94792	0	10.1771	0	13.3567	2.60668	1
PROA	58	PROA	70	7.75	8.29083	0.540833	6.72865	0	5.68286	0	1
PROA	58	PROA	71	9.25	7.2345	0	7.17911	0	8.96722	0	1
PROA	58	PROA	72	7.75	4.4899	0	5.25424	0	4.77925	0	1
PROA	58	PROA	73	9.75	4.28864	0	5.46654	0	6.98662	0	1
PROA	58	PROA	86	11.25	12.0701	0.820103	9.93005	0	8.64666	0	1
PROA	59	PROA	70	10.75	8.77251	0	9.48797	0	9.12489	0	1
PROA	59	PROA	71	6.25	6.83302	0.583021	5.72447	0	5.55812	0	1
PROA	59	PROA	72	8.25	6.06068	0	7.58863	0	7.76633	0	1
PROA	59	PROA	73	7.25	5.35813	0	6.3904	0	8.31761	1.06761	1
PROA	60	PROA	69	10.25	8.16357	0	7.46822	0	10.482	0.23205	1
PROA	60	PROA	70	9.25	6.13499	0	7.18492	0	10.4807	1.23071	1
PROA	60	PROA	71	6.25	5.32548	0	4.04764	0	7.59629	1.34629	1
PROA	61	PROA	68	8.75	7.22415	0	7.28903	0	7.16506	0	1
PROA	61	PROA	69	9.25	5.64503	0	6.69504	0	7.26253	0	1
PROA	61	PROA	70	7.25	4.67295	0	5.19182	0	5.15683	0	1
PROA	61	PROA	71	9.75	6.34512	0	7.45614	0	8.74792	0	1
PROA	62	PROA	68	8.75	5.71226	0	6.39221	0	8.70797	0	1
PROA	62	PROA	69	6.25	4.82687	0	4.0929	0	5.82423	0	1
PROA	62	PROA	70	9.75	6.25792	0	7.73801	0	8.85073	0	1
PROA	62	PROA	71	10.25	8.21336	0	7.71452	0	6.71918	0	1
PROA	63	PROA	67	9.25	7.18058	0	7.81879	0	7.22054	0	1
PROA	63	PROA	68	7.25	4.70044	0	5.45417	0	5.37457	0	1
PROA	63	PROA	69	9.75	6.28658	0	7.57792	0	8.76277	0	1
PROA	64	PROA	68	9.75	5.4242	0	5.03264	0	5.69903	0	1
PROA	64	PROA	69	9.75	6.9981	0	5.64479	0	5.16354	0	1
PROA	66	PROA	94	12.75	17.1195	4.36946	16.9377	4.18767	17.0518	4.30177	0	not included during modeling to allow binding of Pro-sK
PROA	66	PROA	136	12.75	15.3958	2.64585	14.3595	1.60948	15.153	2.40301	0	not included during modeling to allow binding of Pro-sK
PROA	66	PROA	187	12.25	11.7001	0	11.5441	0	10.2166	0	0	not included during modeling to allow binding of Pro-sK
PROA	67	PROA	87	11.75	16.0056	4.25556	16.3899	4.63993	17.1776	5.42755	0	not included during modeling to allow binding of Pro-sK
PROA	67	PROA	90	8.25	13.564	5.31403	13.564	5.31403	13.564	5.31403	0	not included during modeling to allow binding of Pro-sK
PROA	67	PROA	91	11.75	14.5902	2.84024	15.2564	3.50639	14.7686	3.01863	0	not included during modeling to allow binding of Pro-sK
PROA	67	PROA	94	12.25	14.1294	1.87944	13.1431	0.893136	11.2528	0	0	not included during modeling to allow binding of Pro-sK
PROA	67	PROA	129	13.25	11.7519	0	11.349	0	12.2083	0	0	not included during modeling to allow binding of Pro-sK
PROA	67	PROA	136	11.75	11.9249	0.174897	10.9977	0	9.62399	0	0	not included during modeling to allow binding of Pro-sK
PROA	67	PROA	137	12.75	14.8292	2.07916	15.0462	2.29617	16.4442	3.69416	0	not included during modeling to allow binding of Pro-sK
PROA	68	PROA	87	11.75	14.6983	2.94834	15.2039	3.45394	16.0158	4.26576	0	not included during modeling to allow binding of Pro-sK
PROA	68	PROA	90	9.25	12.7513	3.50126	12.7513	3.50126	12.7513	3.50126	0	not included during modeling to allow binding of Pro-sK
PROA	68	PROA	94	11.75	14.5731	2.82308	13.8209	2.07088	11.6774	0	0	not included during modeling to allow binding of Pro-sK
PROA	68	PROA	136	12.75	11.792	0	11.2647	0	9.8874	0	0	not included during modeling to allow binding of Pro-sK
PROA	68	PROA	137	12.75	14.5214	1.77144	14.7727	2.02274	16.0905	3.34055	0	not included during modeling to allow binding of Pro-sK
PROA	69	PROA	86	12.25	14.964	2.71395	15.194	2.94402	15.2478	2.99779	0	not included during modeling to allow binding of Pro-sK
PROA	69	PROA	87	12.25	14.0375	1.78747	15.5505	3.30053	16.3351	4.08508	0	not included during modeling to allow binding of Pro-sK
PROA	69	PROA	90	11.75	13.6027	1.85268	15.0989	3.34887	15.4458	3.69582	0	not included during modeling to allow binding of Pro-sK
PROA	69	PROA	136	12.75	11.1237	0	12.1836	0	11.1213	0	0	not included during modeling to allow binding of Pro-sK
PROA	69	PROA	137	12.75	13.9909	1.24087	15.8922	3.1422	17.3168	4.56683	0	not included during modeling to allow binding of Pro-sK
PROA	70	PROA	86	7.25	12.4413	5.19132	9.87412	2.62412	9.10075	1.85075	0	not included during modeling to allow binding of Pro-sK
PROA	70	PROA	87	10.75	12.0239	1.27393	11.0761	0.326148	11.2746	0.524601	0	not included during modeling to allow binding of Pro-sK
PROA	70	PROA	89	10.25	14.7192	4.4692	12.6996	2.44962	12.3858	2.13577	0	not included during modeling to allow binding of Pro-sK
PROA	70	PROA	90	9.25	12.754	3.50397	11.4456	2.19558	11.2642	2.01422	0	not included during modeling to allow binding of Pro-sK
PROA	70	PROA	137	12.75	12.8471	0.097133	12.4442	0	13.1562	0.406237	0	not included during modeling to allow binding of Pro-sK
PROA	72	PROA	76	12.25	11.1465	0	10.504	0	10.7905	0	1
PROA	72	PROA	78	10.75	11.2805	0.530454	9.06056	0	10.0491	0	1
PROA	72	PROA	82	11.25	12.2252	0.975152	10.553	0	11.1938	0	1
PROA	72	PROA	83	11.25	10.2264	0	8.57545	0	6.49763	0	1
PROA	72	PROA	86	8.75	10.6212	1.87121	8.12592	0	7.28687	0	1
PROA	72	PROA	140	12.25	12.186	0	9.616	0	7.85139	0	1
PROA	74	PROA	78	7.25	8.35372	1.10372	7.31209	0.062092	5.79775	0	1
PROA	74	PROA	82	11.75	13.3497	1.59966	12.0977	0.347725	12.277	0.527036	1
PROA	75	PROA	140	15.25	12.1798	0	10.2568	0	5.99155	0	1
PROA	75	PROA	209	12.75	10.3578	0	11.2345	0	12.7703	0.020265	1
PROA	76	PROA	152	13.25	14.1028	0.852758	13.8428	0.592839	16.0779	2.82786	1
PROA	76	PROA	208	11.75	10.5599	0	11.8503	0.100254	14.1999	2.44991	1
PROA	76	PROA	209	7.75	8.63093	0.880935	9.65519	1.90519	9.05962	1.30962	1
PROA	76	PROA	212	11.75	6.03858	0	7.41804	0	8.5527	0	1
PROA	76	PROA	213	11.75	6.41711	0	6.67174	0	9.30667	0	1
PROA	76	PROA	214	12.25	4.85005	0	3.60695	0	5.20926	0	1
PROA	77	PROA	152	13.25	13.6099	0.359899	13.0086	0	14.8526	1.6026	1
PROA	77	PROA	209	12.75	11.2603	0	12.7014	0	13.6373	0.887292	1
PROA	77	PROA	212	11.75	5.42058	0	5.80842	0	5.53704	0	1
PROA	77	PROA	213	11.75	7.30204	0	7.52751	0	11.1223	0	1
PROA	78	PROA	82	6.25	7.23363	0.98363	5.4447	0	6.76959	0.519591	1
PROA	78	PROA	83	7.75	7.62489	0	6.85319	0	10.3576	2.60764	1
PROA	78	PROA	86	10.25	11.9857	1.73568	9.84128	0	11.6918	1.44183	1
PROA	78	PROA	152	12.25	16.7915	4.54152	17.2842	5.0342	21.4474	9.1974	1	apparently affected by Pro-sK binding, is satisfied in chain D
PROA	79	PROA	83	9.25	6.85133	0	7.68104	0	9.65748	0.407478	1
PROA	79	PROA	147	11.75	10.0153	0	10.9113	0	10.7119	0	1
PROA	79	PROA	148	11.75	8.25342	0	9.19578	0	10.1308	0	1
PROA	80	PROA	84	8.25	6.0216	0	6.16768	0	8.10783	0	1
PROA	80	PROA	143	10.75	9.12404	0	8.5565	0	11.855	1.10502	1
PROA	80	PROA	144	6.75	5.62514	0	4.04952	0	4.86511	0	1
PROA	80	PROA	145	10.75	7.72668	0	7.45733	0	6.83511	0	1
PROA	80	PROA	147	7.25	8.16967	0.919673	6.75037	0	6.70822	0	1
PROA	80	PROA	148	7.25	7.0184	0	5.50635	0	6.08851	0	1
PROA	80	PROA	152	11.75	16.2518	4.50178	14.3857	2.63566	15.8083	4.05834	1
PROA	80	PROA	155	11.75	13.611	1.86102	11.9101	0.160055	12.4076	0.65756	1
PROA	81	PROA	85	8.25	6.17586	0	6.45154	0	8.5795	0.329504	1
PROA	81	PROA	144	10.25	8.29824	0	8.35287	0	9.46886	0	1
PROA	81	PROA	148	10.75	9.77388	0	9.62062	0	9.10246	0	1
PROA	82	PROA	86	8.25	6.27609	0	6.60485	0	8.20859	0	1
PROA	83	PROA	87	8.25	6.18511	0	6.04575	0	5.12158	0	1
PROA	83	PROA	140	7.75	7.89978	0.149777	5.91352	0	3.88743	0	1
PROA	83	PROA	141	10.75	7.86313	0	7.94703	0	8.92021	0	1
PROA	83	PROA	143	10.75	9.88355	0	7.97498	0	9.07244	0	1
PROA	83	PROA	144	7.25	7.56923	0.319235	5.32578	0	4.96882	0	1
PROA	83	PROA	147	10.75	11.4415	0.691537	9.16552	0	9.18022	0	1
PROA	84	PROA	88	8.25	6.25522	0	6.48491	0	4.715	0	1
PROA	84	PROA	140	11.25	7.86566	0	7.99214	0	10.1155	0	1
PROA	84	PROA	141	8.25	6.45523	0	6.38908	0	5.24415	0	1
PROA	84	PROA	144	6.75	7.7795	1.0295	6.07059	0	7.21822	0.468222	1
PROA	84	PROA	145	9.25	9.72623	0.47623	9.17911	0	8.35464	0	1
PROA	84	PROA	148	10.75	12.0721	1.32208	10.803	0.052978	13.4653	2.71532	1
PROA	85	PROA	89	8.25	6.40231	0	6.77686	0	6.77686	0	1
PROA	86	PROA	90	8.25	7.06237	0	7.80377	0	7.95144	0	1
PROA	87	PROA	91	10.75	7.77171	0	8.06043	0	7.58422	0	1
PROA	87	PROA	129	11.75	10.135	0	9.20263	0	10.0957	0	1
PROA	87	PROA	130	11.75	11.3736	0	11.9677	0.217718	12.0018	0.25176	1
PROA	87	PROA	132	12.25	11.6368	0	9.28276	0	9.52927	0	1
PROA	87	PROA	135	12.75	7.68026	0	7.17871	0	8.27857	0	1
PROA	87	PROA	136	12.25	6.7139	0	7.37868	0	8.60868	0	1
PROA	87	PROA	137	8.25	4.72316	0	4.0814	0	4.10425	0	1
PROA	87	PROA	138	10.75	8.09362	0	7.07449	0	6.8897	0	1
PROA	87	PROA	140	7.75	7.23373	0	4.59337	0	5.82583	0	1
PROA	87	PROA	141	6.75	8.02269	1.27269	6.61595	0	6.35388	0	1
PROA	87	PROA	144	9.25	10.8674	1.61736	8.36964	0	6.4501	0	1
PROA	88	PROA	92	8.25	6.49024	0	6.12175	0	5.72028	0	1
PROA	88	PROA	130	11.75	10.9524	0	12.0877	0.33773	12.1471	0.397089	1
PROA	88	PROA	141	9.25	9.40231	0.152307	8.6659	0	8.45894	0	1
PROA	89	PROA	93	8.25	6.18615	0	6.09979	0	5.13812	0	1
PROA	90	PROA	94	8.25	6.28704	0	6.23082	0	5.16427	0	1
PROA	90	PROA	126	10.75	9.40941	0	9.59908	0	9.15862	0	1
PROA	90	PROA	129	7.75	8.95666	1.20666	7.47138	0	7.04366	0	1
PROA	90	PROA	130	11.75	10.9579	0	11.4303	0	10.6567	0	1
PROA	90	PROA	137	10.25	7.39192	0	6.29328	0	6.71994	0	1
PROA	90	PROA	138	11.75	10.5326	0	10.5326	0	10.5326	0	1
PROA	91	PROA	95	8.25	6.22837	0	6.59734	0	7.48359	0	1
PROA	91	PROA	126	7.25	6.61574	0	6.538	0	6.60887	0	1
PROA	91	PROA	127	11.75	9.81011	0	10.8543	0	12.4465	0.696476	1
PROA	91	PROA	129	6.75	7.25887	0.508871	5.5363	0	4.54881	0	1
PROA	91	PROA	130	7.75	8.39098	0.640979	7.33947	0	6.96167	0	1
PROA	91	PROA	137	11.75	7.34545	0	5.05494	0	4.40573	0	1
PROA	91	PROA	138	11.25	9.36316	0	8.09703	0	7.65475	0	1
PROA	92	PROA	96	8.25	6.04813	0	6.14446	0	5.03325	0	1
PROA	92	PROA	126	11.25	9.46296	0	10.2973	0	9.7034	0	1
PROA	93	PROA	97	8.25	5.79734	0	5.87861	0	6.52059	0	1
PROA	94	PROA	98	8.25	6.10163	0	6.33992	0	9.12977	0.87977	1
PROA	94	PROA	122	6.75	6.59026	0	5.59168	0	5.31642	0	1
PROA	94	PROA	123	10.25	7.9812	0	8.29954	0	10.1985	0	1
PROA	94	PROA	125	7.75	8.0054	0.255405	5.82557	0	5.78644	0	1
PROA	94	PROA	126	6.75	6.71421	0	4.87257	0	6.22774	0	1
PROA	94	PROA	129	9.25	9.84122	0.591225	7.18883	0	5.69802	0	1
PROA	94	PROA	130	11.75	11.4692	0	10.0096	0	9.64225	0	1
PROA	95	PROA	99	8.25	6.22448	0	6.50418	0	9.06317	0.813175	1
PROA	95	PROA	122	10.25	8.30991	0	8.89635	0	8.42851	0	1
PROA	95	PROA	123	11.25	8.32132	0	9.539	0	8.90678	0	1
PROA	95	PROA	126	7.75	8.02631	0.276305	7.1695	0	5.80331	0	1
PROA	95	PROA	130	11.25	12.2306	0.980632	11.1462	0	9.08442	0	1
PROA	96	PROA	100	8.25	6.21154	0	6.46019	0	9.29984	1.04984	1
PROA	97	PROA	101	8.25	6.17155	0	6.46927	0	7.43794	0	1
PROA	97	PROA	118	10.25	8.73114	0	7.55675	0	6.1022	0	1
PROA	97	PROA	119	10.75	8.62303	0	9.77226	0	11.2847	0.534746	1
PROA	97	PROA	122	7.25	8.57405	1.32405	6.4393	0	6.54797	0	1
PROA	97	PROA	126	10.75	11.3018	0.551761	10.0099	0	11.133	0.382966	1
PROA	98	PROA	102	8.25	6.49716	0	6.85533	0	6.10654	0	1
PROA	98	PROA	118	10.75	6.91049	0	7.54584	0	7.31888	0	1
PROA	98	PROA	119	7.25	5.53632	0	6.39762	0	6.44046	0	1
PROA	98	PROA	122	6.25	6.90181	0.651811	5.20508	0	5.38701	0	1
PROA	98	PROA	123	8.25	7.69166	0	6.64069	0	5.08197	0	1
PROA	98	PROA	126	8.75	9.97567	1.22567	7.536	0	6.96198	0	1
PROA	99	PROA	103	8.25	6.30404	0	6.4483	0	4.41601	0	1
PROA	100	PROA	104	8.25	6.12235	0	6.33031	0	7.17119	0	1
PROA	101	PROA	105	8.25	6.3301	0	6.63292	0	6.63292	0	1
PROA	101	PROA	110	11.75	9.62028	0	8.62168	0	8.71949	0	1
PROA	101	PROA	115	6.75	7.6061	0.856096	6.44225	0	8.2681	1.5181	1
PROA	101	PROA	116	10.25	6.47981	0	4.50479	0	4.01358	0	1
PROA	101	PROA	118	7.25	6.59062	0	4.63721	0	4.56156	0	1
PROA	101	PROA	119	6.75	5.51507	0	4.42183	0	4.42942	0	1
PROA	101	PROA	122	8.75	10.0691	1.31914	7.22164	0	7.30257	0	1
PROA	102	PROA	106	8.25	6.45749	0	6.55846	0	7.38224	0	1
PROA	102	PROA	115	10.25	7.65667	0	7.42781	0	6.31151	0	1
PROA	102	PROA	119	8.25	6.13166	0	5.56717	0	3.96531	0	1
PROA	103	PROA	107	8.25	6.31342	0	5.84627	0	6.75444	0	1
PROA	104	PROA	108	10.25	5.51127	0	6.4262	0	5.94218	0	1
PROA	104	PROA	109	6.25	7.11844	0.868444	5.83025	0	4.68074	0	1
PROA	104	PROA	110	6.25	7.14615	0.896147	5.69689	0	5.42153	0	1
PROA	104	PROA	115	7.75	7.89847	0.148471	7.55485	0	10.2927	2.54274	1
PROA	105	PROA	109	9.75	8.13647	0	9.45416	0	9.95984	0.20984	1
PROA	105	PROA	110	7.75	6.7959	0	6.8959	0	7.68623	0	1
PROA	105	PROA	111	10.75	7.50609	0	9.48514	0	10.9854	0.235376	1
PROA	105	PROA	112	7.25	5.49233	0	5.44194	0	5.32105	0	1
PROA	105	PROA	115	6.25	5.38318	0	3.91577	0	4.57139	0	1
PROA	105	PROA	116	9.25	7.0998	0	6.32358	0	7.23537	0	1
PROA	105	PROA	119	8.75	8.69936	0	6.35507	0	5.88175	0	1
PROA	106	PROA	112	11.75	8.18893	0	9.15044	0	9.33296	0	1
PROA	108	PROA	112	11.75	8.65367	0	10.6986	0	9.54036	0	1
PROA	108	PROA	115	11.75	10.1414	0	11.9045	0.154494	13.6967	1.94669	1
PROA	110	PROA	114	7.25	7.29642	0.046417	6.03846	0	5.60034	0	1
PROA	110	PROA	115	7.25	6.66994	0	6.7466	0	9.38438	2.13438	1
PROA	110	PROA	118	11.25	11.2523	0.00232	8.90236	0	10.0432	0	1
PROA	111	PROA	115	8.75	6.66327	0	9.07167	0.321668	11.9743	3.22425	1
PROA	112	PROA	116	8.25	6.46097	0	8.3793	0.129301	10.4421	2.19212	1
PROA	113	PROA	117	8.25	8.00205	0	8.68178	0.431784	7.70351	0	1
PROA	114	PROA	118	8.25	8.11583	0	7.56247	0	10.1593	1.90928	1
PROA	115	PROA	119	8.25	6.73227	0	4.57606	0	4.89281	0	1
PROA	116	PROA	120	8.25	8.25934	0.009344	8.70266	0.452661	9.86821	1.61821	1
PROA	117	PROA	121	8.25	6.20886	0	5.8131	0	5.99578	0	1
PROA	118	PROA	122	8.25	5.80586	0	5.50198	0	4.50801	0	1
PROA	119	PROA	123	8.25	7.19845	0	7.77836	0	8.97563	0.725628	1
PROA	120	PROA	124	8.25	7.63881	0	7.89034	0	9.94448	1.69448	1
PROA	121	PROA	125	8.25	6.77604	0	7.12515	0	9.28822	1.03822	1
PROA	122	PROA	126	8.25	5.9417	0	6.40402	0	6.86458	0	1
PROA	123	PROA	127	8.25	6.14968	0	6.48771	0	4.56104	0	1
PROA	124	PROA	128	8.25	6.34203	0	6.76169	0	7.34284	0	1
PROA	124	PROA	183	9.25	11.2806	2.03064	9.02745	0	8.42683	0	1
PROA	124	PROA	184	11.75	10.5822	0	9.79224	0	9.71503	0	1
PROA	124	PROA	187	11.75	13.409	1.65901	11.5047	0	11.0346	0	1
PROA	125	PROA	129	8.25	6.56772	0	6.58802	0	7.00316	0	1
PROA	126	PROA	130	8.25	6.42827	0	6.51192	0	5.06972	0	1
PROA	127	PROA	131	8.25	7.00611	0	7.39071	0	8.57713	0.327133	1
PROA	127	PROA	170	11.75	12.3539	0.603869	11.2648	0	12.3674	0.617414	1
PROA	128	PROA	132	12.75	7.36802	0	8.17416	0	7.39284	0	1
PROA	128	PROA	133	12.25	10.7655	0	11.8241	0	11.577	0	1
PROA	128	PROA	135	12.75	11.4795	0	11.8975	0	12.0932	0	1
PROA	128	PROA	136	11.25	8.54979	0	7.19532	0	7.09689	0	1
PROA	128	PROA	137	11.75	10.0555	0	10.6391	0	12.3018	0.551829	1
PROA	128	PROA	138	11.75	9.57628	0	10.4925	0	10.838	0	1
PROA	128	PROA	170	11.25	11.3709	0.120914	10.8602	0	10.2404	0	1
PROA	128	PROA	183	11.75	11.3258	0	10.1349	0	9.40959	0	1
PROA	128	PROA	184	11.75	9.02983	0	8.77893	0	8.4048	0	1
PROA	128	PROA	187	8.75	10.3092	1.5592	8.21013	0	7.37135	0	1
PROA	129	PROA	135	12.75	8.68044	0	9.2655	0	11.1062	0	1
PROA	129	PROA	136	7.75	5.33891	0	3.99491	0	5.40754	0	1
PROA	129	PROA	137	7.75	6.33964	0	5.63042	0	6.77883	0	1
PROA	129	PROA	138	7.75	6.49311	0	6.89052	0	7.33084	0	1
PROA	129	PROA	139	12.75	8.7922	0	9.32732	0	10.1908	0	1
PROA	130	PROA	136	12.75	7.52087	0	8.12899	0	9.25297	0	1
PROA	130	PROA	137	12.75	7.1158	0	7.92579	0	8.00943	0	1
PROA	130	PROA	138	11.75	5.40239	0	6.62042	0	7.07198	0	1
PROA	130	PROA	141	17.75	11.8956	0	12.168	0	12.991	0	1
PROA	131	PROA	135	10.75	10.2368	0	11.5343	0.784347	12.6489	1.89886	1
PROA	131	PROA	136	11.75	8.30508	0	7.71819	0	9.36895	0	1
PROA	131	PROA	137	11.75	8.95164	0	10.2945	0	12.2455	0.49548	1
PROA	131	PROA	138	11.75	6.57572	0	7.80174	0	9.05781	0	1
PROA	131	PROA	163	11.25	10.4841	0	10.9322	0	11.8863	0.636289	1
PROA	131	PROA	166	9.25	8.83188	0	7.98506	0	9.93303	0.683028	1
PROA	131	PROA	167	11.75	8.95061	0	9.06887	0	10.3026	0	1
PROA	131	PROA	170	9.25	8.20547	0	6.24644	0	4.9967	0	1
PROA	132	PROA	136	8.25	5.96551	0	4.41583	0	5.26678	0	1
PROA	132	PROA	137	11.25	7.02226	0	6.73447	0	7.40501	0	1
PROA	132	PROA	138	11.25	4.89542	0	4.11654	0	4.13967	0	1
PROA	132	PROA	139	10.75	4.83273	0	4.05788	0	5.01229	0	1
PROA	132	PROA	140	11.25	8.06382	0	7.48515	0	10.3128	0	1
PROA	132	PROA	163	10.75	8.46986	0	9.27061	0	9.82349	0	1
PROA	132	PROA	166	11.25	8.71364	0	8.6523	0	9.60127	0	1
PROA	133	PROA	137	14.75	8.98406	0	11.6654	0	12.9826	0	1
PROA	133	PROA	138	13.25	6.69522	0	8.19942	0	8.94653	0	1
PROA	133	PROA	139	10.75	4.42811	0	5.86645	0	6.65486	0	1
PROA	133	PROA	140	11.75	7.60303	0	9.97685	0	11.5882	0	1
PROA	133	PROA	159	8.25	6.91853	0	6.0987	0	5.28725	0	1
PROA	133	PROA	160	11.25	8.38514	0	8.70835	0	8.6386	0	1
PROA	133	PROA	162	7.25	7.1175	0	6.21339	0	6.92987	0	1
PROA	133	PROA	163	6.25	5.23291	0	3.96523	0	3.44338	0	1
PROA	133	PROA	164	11.75	8.63917	0	8.54729	0	8.54363	0	1
PROA	133	PROA	166	7.25	7.06438	0	5.01644	0	6.4673	0	1
PROA	133	PROA	167	10.75	7.76291	0	6.52282	0	6.32521	0	1
PROA	133	PROA	170	12.25	10.5286	0	8.73179	0	7.92484	0	1
PROA	133	PROA	187	11.75	13.3326	1.58256	12.3513	0.601252	12.6541	0.904125	1
PROA	133	PROA	188	11.75	11.2882	0	10.3946	0	8.90829	0	1
PROA	133	PROA	191	8.25	9.92661	1.67661	7.63467	0	5.23658	0	1
PROA	133	PROA	195	11.75	10.5854	0	8.20432	0	5.94264	0	1
PROA	134	PROA	138	10.75	6.85799	0	7.85054	0	7.51196	0	1
PROA	134	PROA	139	7.25	4.17905	0	5.6178	0	6.74885	0	1
PROA	134	PROA	140	7.25	5.67904	0	7.56716	0.317163	10.4668	3.21676	1
PROA	134	PROA	142	11.75	8.32975	0	9.00393	0	10.7633	0	1
PROA	134	PROA	143	8.75	8.42572	0	9.12603	0.376034	9.92792	1.17792	1
PROA	134	PROA	156	10.75	10.1939	0	10.477	0	13.3537	2.60371	1
PROA	134	PROA	159	7.75	7.99964	0.249638	7.72129	0	9.12058	1.37058	1
PROA	134	PROA	160	11.75	9.59185	0	10.9426	0	13.3755	1.62553	1
PROA	134	PROA	162	10.75	10.1525	0	10.4335	0	11.9868	1.2368	1
PROA	134	PROA	163	8.75	7.99155	0	7.56417	0	8.89319	0.143185	1
PROA	134	PROA	166	11.75	10.673	0	9.66448	0	10.9591	0	1
PROA	134	PROA	191	11.75	10.2239	0	8.2978	0	7.05445	0	1
PROA	135	PROA	139	6.25	4.96315	0	6.46491	0.214906	6.29252	0.042518	1
PROA	135	PROA	140	7.25	3.97161	0	4.56494	0	5.32073	0	1
PROA	135	PROA	141	11.25	7.64643	0	9.66639	0	11.3561	0.106072	1
PROA	135	PROA	142	11.75	8.76073	0	9.86912	0	10.1576	0	1
PROA	135	PROA	143	11.75	8.24263	0	7.95909	0	6.32463	0	1
PROA	135	PROA	159	11.75	10.4238	0	9.79603	0	8.26798	0	1
PROA	135	PROA	163	11.75	11.6543	0	11.8062	0.056203	10.1408	0	1
PROA	136	PROA	140	10.75	6.11947	0	7.16601	0	9.76358	0	1
PROA	136	PROA	141	11.75	8.88855	0	10.2531	0	12.7631	1.01306	1
PROA	136	PROA	163	12.75	13.0891	0.339087	12.9155	0.165501	13.326	0.576023	1
PROA	137	PROA	141	8.75	6.84961	0	7.28535	0	7.18275	0	1
PROA	138	PROA	142	8.25	7.87187	0	7.57265	0	7.04437	0	1
PROA	138	PROA	159	11.75	11.687	0	10.7005	0	9.46567	0	1
PROA	139	PROA	143	8.25	6.85881	0	6.91772	0	6.22263	0	1
PROA	139	PROA	156	11.25	11.1558	0	11.4295	0.179455	11.3734	0.123376	1
PROA	139	PROA	159	7.25	8.13617	0.88617	7.01147	0	5.85725	0	1
PROA	139	PROA	160	11.25	10.9246	0	12.2086	0.958643	12.9675	1.71751	1
PROA	139	PROA	162	11.25	9.77097	0	8.59614	0	8.37183	0	1
PROA	139	PROA	163	10.25	9.06179	0	8.98326	0	8.36777	0	1
PROA	139	PROA	195	12.75	14.0351	1.28515	13.3422	0.592187	11.9808	0	1
PROA	140	PROA	144	8.25	6.36509	0	6.29186	0	4.88479	0	1
PROA	140	PROA	159	11.25	9.13679	0	9.13878	0	8.85856	0	1
PROA	141	PROA	145	8.25	6.20161	0	6.24945	0	4.86781	0	1
PROA	142	PROA	146	8.25	6.53414	0	6.84857	0	6.35841	0	1
PROA	142	PROA	155	10.25	10.6174	0.36744	9.74554	0	11.0189	0.768897	1
PROA	142	PROA	158	10.25	7.93975	0	6.9951	0	9.0749	0	1
PROA	142	PROA	159	6.75	6.72311	0	5.08917	0	5.11601	0	1
PROA	142	PROA	162	8.75	9.06823	0.318228	6.25053	0	5.32854	0	1
PROA	143	PROA	147	8.25	6.02399	0	5.59206	0	7.56482	0	1
PROA	143	PROA	152	10.75	11.8782	1.12816	10.6964	0	11.4286	0.678634	1
PROA	143	PROA	155	7.25	7.63403	0.384027	6.85238	0	7.34512	0.095118	1
PROA	143	PROA	156	9.25	6.70299	0	6.79191	0	5.30341	0	1
PROA	143	PROA	158	10.75	6.98105	0	6.6283	0	7.94976	0	1
PROA	143	PROA	159	7.75	6.46019	0	5.67341	0	4.23101	0	1
PROA	144	PROA	148	8.25	6.29856	0	6.90946	0	10.0421	1.79206	1
PROA	144	PROA	155	10.75	9.65669	0	10.1686	0	10.8085	0.058521	1
PROA	145	PROA	149	8.25	7.64813	0	8.06067	0	8.42949	0.179494	1
PROA	145	PROA	155	10.75	10.7923	0.042316	10.3402	0	11.7352	0.985245	1
PROA	146	PROA	150	7.25	6.7951	0	7.01313	0	8.24435	0.994352	1
PROA	146	PROA	152	10.75	9.34403	0	7.46445	0	8.37007	0	1
PROA	146	PROA	154	10.25	10.2229	0	10.2022	0	10.7772	0.527207	1
PROA	146	PROA	155	5.75	7.77677	2.02677	5.27775	0	6.96136	1.21135	1
PROA	146	PROA	158	8.25	7.04855	0	4.1051	0	4.23941	0	1
PROA	146	PROA	159	9.75	8.97733	0	7.73799	0	7.69574	0	1
PROA	147	PROA	151	9.75	8.85276	0	10.4239	0.67391	9.98607	0.236073	1
PROA	147	PROA	152	7.75	8.34288	0.592876	7.78036	0.03036	9.81789	2.06789	1
PROA	147	PROA	154	10.75	7.84687	0	7.19629	0	5.66965	0	1
PROA	147	PROA	155	6.75	6.55635	0	5.28188	0	5.88511	0	1
PROA	149	PROA	155	10.75	9.69337	0	8.9797	0	10.5156	0	1
PROA	150	PROA	154	6.25	6.91137	0.661371	6.10581	0	5.25411	0	1
PROA	150	PROA	155	7.25	7.01096	0	5.30599	0	4.09549	0	1
PROA	150	PROA	158	9.25	9.98868	0.738682	8.3888	0	6.5629	0	1
PROA	151	PROA	155	9.25	8.44675	0	8.54567	0	7.5538	0	1
PROA	152	PROA	156	8.25	8.63907	0.389065	8.30059	0.050588	9.83257	1.58257	1
PROA	152	PROA	202	10.75	9.19145	0	9.3575	0	10.0437	0	1
PROA	152	PROA	205	10.75	11.5311	0.781067	12.9726	2.22264	14.129	3.37895	1
PROA	152	PROA	206	11.75	12.184	0.433993	12.7494	0.999394	12.6224	0.872412	1
PROA	152	PROA	209	11.75	10.9343	0	12.1447	0.394678	16.0749	4.32495	1
PROA	153	PROA	157	8.25	9.32565	1.07565	7.94261	0	7.52858	0	1
PROA	153	PROA	202	8.25	7.89057	0	8.27237	0.022369	8.37905	0.12905	1
PROA	153	PROA	203	9.25	7.67835	0	7.65496	0	7.43089	0	1
PROA	153	PROA	205	10.25	8.18657	0	8.50964	0	9.24979	0	1
PROA	153	PROA	206	8.25	9.07252	0.82252	9.57479	1.32479	11.0253	2.77526	1
PROA	153	PROA	207	12.75	6.79841	0	6.0145	0	5.0661	0	1
PROA	153	PROA	209	12.75	7.82001	0	8.8085	0	12.011	0	1
PROA	154	PROA	158	8.25	9.59429	1.34429	9.65651	1.40651	8.62108	0.37108	1
PROA	155	PROA	159	8.25	8.14203	0	7.67056	0	9.01938	0.769384	1
PROA	156	PROA	160	8.25	6.53048	0	6.6181	0	9.40484	1.15484	1
PROA	156	PROA	198	10.25	9.12172	0	7.18418	0	7.69659	0	1
PROA	156	PROA	199	10.75	9.75116	0	10.5263	0	13.55	2.8	1
PROA	156	PROA	202	7.75	5.67401	0	5.49987	0	5.36452	0	1
PROA	156	PROA	205	11.75	11.08	0	11.2547	0	11.9315	0.181461	1
PROA	157	PROA	161	8.25	6.30443	0	6.53775	0	5.8926	0	1
PROA	157	PROA	199	8.75	7.68073	0	8.5075	0	7.28337	0	1
PROA	157	PROA	202	8.25	4.66003	0	4.06099	0	8.09035	0	1
PROA	157	PROA	203	10.75	6.81134	0	6.2669	0	4.44968	0	1
PROA	158	PROA	162	8.25	7.23998	0	7.78775	0	8.23125	0	1
PROA	159	PROA	163	8.25	5.53898	0	5.32852	0	4.09576	0	1
PROA	160	PROA	164	8.25	6.12508	0	6.36575	0	4.83465	0	1
PROA	160	PROA	195	6.75	7.39425	0.644251	6.44828	0	5.5012	0	1
PROA	160	PROA	196	10.75	8.86311	0	9.04387	0	7.17363	0	1
PROA	160	PROA	198	7.75	7.93435	0.184351	6.22245	0	6.44793	0	1
PROA	160	PROA	199	6.75	7.2236	0.473596	6.30077	0	6.08391	0	1
PROA	160	PROA	202	9.25	7.62483	0	5.0847	0	4.60291	0	1
PROA	161	PROA	165	8.25	6.74993	0	7.24954	0	8.3472	0.097196	1
PROA	161	PROA	195	10.75	10.1179	0	10.4326	0	12.2097	1.45973	1
PROA	161	PROA	199	10.75	9.46343	0	10.1313	0	11.2599	0.509945	1
PROA	162	PROA	166	8.25	6.11315	0	5.88023	0	5.03628	0	1
PROA	163	PROA	167	8.25	5.93879	0	5.99994	0	6.51265	0	1
PROA	163	PROA	191	10.25	9.20925	0	7.92483	0	6.7782	0	1
PROA	163	PROA	192	11.25	8.74894	0	9.22089	0	9.78685	0	1
PROA	163	PROA	194	11.25	11.1419	0	10.2131	0	11.0244	0	1
PROA	163	PROA	195	7.25	8.00562	0.755618	5.5682	0	4.82604	0	1
PROA	163	PROA	198	10.75	10.8829	0.132949	8.36893	0	8.10179	0	1
PROA	164	PROA	168	8.25	6.38727	0	6.62238	0	6.82773	0	1
PROA	164	PROA	191	10.75	8.85128	0	9.43162	0	8.59904	0	1
PROA	164	PROA	192	8.75	6.88479	0	7.62123	0	7.46107	0	1
PROA	164	PROA	195	6.75	7.39877	0.648767	6.04695	0	5.34448	0	1
PROA	164	PROA	196	9.25	8.83449	0	8.37088	0	5.15534	0	1
PROA	164	PROA	199	9.75	9.81228	0.062281	8.28472	0	7.46775	0	1
PROA	165	PROA	169	8.25	6.18734	0	6.26288	0	6.31768	0	1
PROA	166	PROA	170	8.25	5.95743	0	5.91379	0	6.97376	0	1
PROA	166	PROA	191	10.75	10.2483	0	8.98274	0	10.1117	0	1
PROA	167	PROA	171	8.25	6.09754	0	6.84917	0	7.17211	0	1
PROA	167	PROA	188	6.75	6.29258	0	5.57667	0	6.70194	0	1
PROA	167	PROA	189	10.25	8.45577	0	9.12737	0	9.43975	0	1
PROA	167	PROA	191	7.25	6.90409	0	4.6349	0	4.53174	0	1
PROA	167	PROA	192	6.25	6.20637	0	4.89458	0	4.44064	0	1
PROA	167	PROA	195	8.75	9.34045	0.590451	6.53188	0	5.46191	0	1
PROA	168	PROA	172	8.25	5.96065	0	6.24536	0	6.64121	0	1
PROA	168	PROA	188	9.75	7.75357	0	8.03752	0	9.35758	0	1
PROA	168	PROA	192	9.25	7.18129	0	6.55473	0	5.67767	0	1
PROA	169	PROA	173	8.25	6.07509	0	6.35156	0	9.97624	1.72624	1
PROA	170	PROA	174	8.25	6.34976	0	6.52671	0	6.98803	0	1
PROA	170	PROA	184	10.25	8.8839	0	7.74906	0	8.42826	0	1
PROA	170	PROA	185	10.75	8.33505	0	9.14818	0	10.7667	0.016731	1
PROA	170	PROA	187	10.75	10.4166	0	9.44384	0	11.2171	0.467128	1
PROA	170	PROA	188	6.75	7.49487	0.744867	5.59931	0	4.80803	0	1
PROA	170	PROA	191	10.25	10.5421	0.292113	8.19283	0	8.20947	0	1
PROA	171	PROA	175	8.25	6.3011	0	6.00041	0	6.41344	0	1
PROA	171	PROA	184	10.75	7.56271	0	7.19483	0	7.19483	0	1
PROA	171	PROA	185	7.75	5.52339	0	5.83329	0	5.30749	0	1
PROA	171	PROA	188	6.25	5.78934	0	4.26631	0	4.51918	0	1
PROA	171	PROA	189	9.25	7.57437	0	8.31166	0	8.44929	0	1
PROA	171	PROA	192	8.75	8.96313	0.213134	7.99442	0	7.99442	0	1
PROA	172	PROA	176	8.25	7.03986	0	7.38381	0	6.99729	0	1
PROA	173	PROA	177	8.25	6.71242	0	6.28903	0	4.1548	0	1
PROA	173	PROA	178	11.25	9.29626	0	9.19865	0	6.8331	0	1
PROA	173	PROA	184	11.25	9.73565	0	8.57955	0	8.72385	0	1
PROA	174	PROA	178	7.75	6.63715	0	7.28812	0	8.17674	0.426742	1
PROA	174	PROA	179	11.75	8.13767	0	7.40417	0	6.63438	0	1
PROA	174	PROA	180	10.75	8.87828	0	9.82147	0	10.5959	0	1
PROA	174	PROA	181	7.25	5.62777	0	4.7536	0	7.12051	0	1
PROA	174	PROA	182	11.25	8.40968	0	9.00283	0	9.37147	0	1
PROA	174	PROA	184	6.25	6.55404	0.304039	4.00161	0	3.86961	0	1
PROA	174	PROA	185	6.75	6.26089	0	5.1035	0	6.80895	0.058953	1
PROA	174	PROA	187	10.75	10.5704	0	8.97293	0	9.52201	0	1
PROA	174	PROA	188	8.75	9.32088	0.570882	6.85854	0	5.41207	0	1
PROA	175	PROA	179	12.75	9.3325	0	10.8249	0	11.1141	0	1
PROA	175	PROA	180	12.25	8.68297	0	10.7223	0	11.6042	0	1
PROA	175	PROA	181	10.75	5.50237	0	5.24743	0	6.94255	0	1
PROA	175	PROA	184	11.25	8.27218	0	8.57032	0	9.86692	0	1
PROA	175	PROA	185	9.25	6.48778	0	5.51555	0	6.52311	0	1
PROA	177	PROA	181	10.75	6.91296	0	7.18899	0	8.19663	0	1
PROA	177	PROA	184	10.75	10.0985	0	9.00308	0	8.94221	0	1
PROA	178	PROA	182	11.25	9.74809	0	11.6675	0.417465	13.1123	1.86229	1
PROA	178	PROA	184	10.25	9.1609	0	7.94319	0	8.55188	0	1
PROA	178	PROA	185	10.75	10.7558	0.005776	11.0868	0.336848	14.324	3.57402	1
PROA	180	PROA	184	10.25	8.02103	0	8.86955	0	9.52459	0	1
PROA	180	PROA	185	10.75	9.08965	0	9.06222	0	11.3061	0.556138	1
PROA	181	PROA	185	8.25	5.64796	0	4.86301	0	8.21999	0	1
PROA	182	PROA	186	8.25	5.78311	0	5.83347	0	5.41192	0	1
PROA	183	PROA	187	8.25	6.26661	0	6.43832	0	6.06028	0	1
PROA	184	PROA	188	8.25	6.39595	0	6.53947	0	5.42982	0	1
PROA	185	PROA	189	8.25	6.16105	0	6.56622	0	4.89627	0	1
PROA	186	PROA	190	8.25	6.39695	0	6.90349	0	7.38018	0	1
PROA	187	PROA	191	8.25	6.42936	0	6.67458	0	8.86674	0.616737	1
PROA	188	PROA	192	8.25	5.98114	0	6.06723	0	8.03191	0	1
PROA	189	PROA	193	8.25	6.01428	0	6.2184	0	6.31992	0	1
PROA	190	PROA	194	8.25	5.83893	0	5.68768	0	6.14668	0	1
PROA	191	PROA	195	8.25	5.99941	0	6.22169	0	4.61228	0	1
PROA	192	PROA	196	8.25	7.17784	0	7.67643	0	6.37879	0	1
PROA	193	PROA	197	8.25	7.47286	0	7.85733	0	7.31133	0	1
PROA	194	PROA	198	8.25	6.8662	0	7.04484	0	7.13713	0	1
PROA	195	PROA	199	8.25	6.201	0	6.56392	0	9.88353	1.63353	1
PROA	196	PROA	200	8.25	6.82772	0	7.95121	0	9.77589	1.52588	1
PROA	197	PROA	201	8.25	7.80177	0	8.14967	0	8.04109	0	1
PROA	198	PROA	202	8.25	6.55861	0	5.63818	0	4.45933	0	1
PROA	199	PROA	203	8.25	7.28423	0	7.53425	0	4.61307	0	1
PROA	200	PROA	204	8.25	6.03811	0	5.84392	0	9.2854	1.0354	1
PROA	201	PROA	205	8.25	5.39756	0	5.68718	0	5.84478	0	1
PROA	202	PROA	206	8.25	7.25166	0	8.21928	0	9.56225	1.31225	1
PROA	203	PROA	207	8.25	8.08655	0	8.37438	0.124375	8.66245	0.412455	1
PROA	204	PROA	208	8.25	7.3281	0	7.85072	0	8.6049	0.354899	1
PROA	205	PROA	209	8.25	7.02318	0	7.37132	0	10.2151	1.96515	1
PROA	206	PROA	210	8.25	7.91456	0	8.16034	0	10.8343	2.58434	1
PROA	207	PROA	211	8.25	8.32794	0.077938	9.04554	0.79554	10.6538	2.40376	1
PROA	207	PROA	272	12.75	17.008	4.25796	17.4178	4.66777	15.0758	2.32585	0	not included in modeling for A/D to allow asymmetric structure
PROA	208	PROA	212	8.25	8.93069	0.68069	8.9544	0.704401	12.912	4.66202	1
PROA	209	PROA	213	8.25	8.48805	0.238048	8.39441	0.144413	8.57295	0.322947	1
PROA	210	PROA	214	8.25	8.14483	0	8.44334	0.193342	10.0325	1.78247	1
PROA	211	PROA	215	8.25	7.98086	0	8.04437	0	9.63173	1.38173	1
PROA	211	PROA	216	11.75	10.2579	0	11.0086	0	10.7185	0	1
PROA	211	PROA	217	12.75	11.1905	0	11.9578	0	14.7378	1.98779	1
PROA	211	PROA	218	12.75	11.7342	0	12.3019	0	13.1602	0.410238	1
PROA	211	PROA	221	12.75	13.4234	0.673429	14.8943	2.14428	16.5453	3.79531	1
PROA	212	PROA	216	8.25	7.19692	0	7.81867	0	7.13159	0	1
PROA	212	PROA	217	11.75	8.93295	0	9.45112	0	11.9858	0.235812	1
PROA	212	PROA	218	12.75	10.3517	0	11.5792	0	12.3847	0	1
PROA	213	PROA	217	9.75	6.03164	0	5.38314	0	4.96314	0	1
PROA	213	PROA	218	11.75	7.78709	0	7.57843	0	6.34933	0	1
PROA	214	PROA	218	11.75	5.37299	0	5.88999	0	6.74512	0	1
PROA	214	PROA	219	11.75	6.31898	0	7.91901	0	6.39654	0	1
PROA	214	PROA	220	12.75	8.15272	0	9.36645	0	8.37708	0	1
PROA	214	PROA	221	11.75	8.31453	0	8.70118	0	8.47653	0	1
PROA	215	PROA	219	8.25	6.32724	0	8.23162	0	5.71537	0	1
PROA	215	PROA	220	11.75	9.20391	0	11.8637	0.113679	13	1.25004	1
PROA	215	PROA	221	12.75	10.6708	0	12.6469	0	14.9136	2.16356	1
PROA	216	PROA	220	11.25	10.2282	0	11.2783	0.028261	12.1156	0.865618	1
PROA	216	PROA	221	11.75	11.3069	0	11.2742	0	11.949	0.198965	1
PROA	217	PROA	221	10.75	9.06145	0	8.65645	0	9.52308	0	1
PROA	218	PROA	222	8.25	8.20025	0	8.25846	0.008456	9.26257	1.01257	1
PROA	219	PROA	223	12.75	11.9681	0	14.4642	1.71418	17.7236	4.97361	1
PROA	219	PROA	224	12.75	9.14531	0	9.43612	0	11.5069	0	1
PROA	220	PROA	224	13.75	8.32302	0	8.73166	0	11.7482	0	1
PROA	222	PROA	247	12.75	10.5817	0	11.2613	0	13.9212	1.17117	1
PROA	223	PROA	245	14.25	15.068	0.818027	15.7591	1.50913	15.3048	1.0548	1
PROA	223	PROA	246	12.75	11.5935	0	12.2803	0	12.7968	0.04676	1
PROA	223	PROA	247	10.75	7.97531	0	8.1977	0	10.2678	0	1
PROA	223	PROA	248	11.75	6.10928	0	5.92646	0	5.21944	0	1
PROA	223	PROA	249	12.75	6.72371	0	5.36742	0	3.90721	0	1
PROA	224	PROA	246	11.75	10.2516	0	10.6782	0	10.3196	0	1
PROA	224	PROA	247	11.75	6.74166	0	5.79011	0	6.61151	0	1
PROA	224	PROA	248	10.75	6.68564	0	7.008	0	8.00738	0	1
PROA	224	PROA	249	10.75	8.51975	0	9.56622	0	8.18131	0	1
PROA	225	PROA	245	12.75	12.577	0	11.3594	0	11.719	0	1
PROA	225	PROA	246	7.75	9.05113	1.30113	7.88896	0.138959	8.63278	0.882783	1
PROA	225	PROA	247	9.25	6.11363	0	3.87096	0	4.37863	0	1
PROA	225	PROA	248	7.25	6.69513	0	7.39792	0.147916	10.9291	3.67911	1
PROA	225	PROA	249	9.25	7.97747	0	8.66765	0	8.89747	0	1
PROA	226	PROA	246	12.75	9.29542	0	9.85985	0	10.5446	0	1
PROA	226	PROA	247	11.75	6.69469	0	7.39117	0	7.60301	0	1
PROA	226	PROA	248	8.75	5.84007	0	7.83703	0	9.94315	1.19315	1
PROA	226	PROA	249	6.75	5.38272	0	5.43165	0	5.52201	0	1
PROA	226	PROA	250	9.25	7.29161	0	8.99156	0	10.3242	1.07418	1
PROA	226	PROA	251	7.75	7.96845	0.218449	7.1427	0	7.98443	0.234426	1
PROA	227	PROA	238	10.75	9.02021	0	7.54784	0	6.3562	0	1
PROA	227	PROA	241	7.75	8.85137	1.10137	6.8849	0	4.54216	0	1
PROA	227	PROA	242	10.25	7.69436	0	6.07585	0	7.65283	0	1
PROA	227	PROA	246	11.25	5.93526	0	4.88328	0	4.35722	0	1
PROA	227	PROA	247	12.75	4.35842	0	4.78839	0	5.10859	0	1
PROA	227	PROA	248	7.25	4.5492	0	5.60835	0	7.1802	0	1
PROA	227	PROA	249	9.25	5.19452	0	5.56937	0	6.27714	0	1
PROA	227	PROA	250	6.75	5.55947	0	4.96821	0	4.65048	0	1
PROA	227	PROA	251	9.25	6.70266	0	6.51336	0	7.31011	0	1
PROA	228	PROA	250	9.75	7.45267	0	9.67514	0	10.318	0.567996	1
PROA	228	PROA	251	6.75	6.50002	0	8.00235	1.25235	8.86957	2.11957	1
PROA	228	PROA	252	9.75	6.7223	0	9.49091	0	10.4525	0.702504	1
PROA	228	PROA	253	8.25	6.66554	0	8.7238	0.473802	10.5914	2.34144	1
PROA	228	PROA	256	11.75	9.22052	0	9.4729	0	9.15035	0	1
PROA	229	PROA	233	7.25	6.64845	0	4.82137	0	5.00745	0	1
PROA	229	PROA	235	11.75	9.47223	0	8.75644	0	8.96348	0	1
PROA	229	PROA	237	10.25	8.53684	0	6.43047	0	5.88571	0	1
PROA	229	PROA	238	8.25	7.62845	0	5.21465	0	4.52344	0	1
PROA	229	PROA	241	10.25	9.45753	0	6.82651	0	5.7332	0	1
PROA	229	PROA	250	7.75	8.63925	0.889245	8.45704	0.707039	8.81206	1.06206	1
PROA	229	PROA	251	9.25	7.19319	0	8.22956	0	9.754	0.504005	1
PROA	229	PROA	252	7.25	5.7859	0	6.9557	0	8.4617	1.2117	1
PROA	229	PROA	253	9.25	5.33912	0	7.65808	0	9.7614	0.511402	1
PROA	229	PROA	259	11.75	13.6301	1.88007	13.1274	1.37735	14.52	2.76997	1
PROA	229	PROA	262	10.75	10.629	0	8.42941	0	8.46351	0	1
PROA	229	PROA	281	7.25	7.93666	0.686659	7.87129	0.621289	8.79618	1.54618	1
PROA	230	PROA	252	9.75	6.9677	0	9.02279	0	11.3906	1.64056	1
PROA	230	PROA	253	7.25	4.572	0	6.95736	0	9.19025	1.94025	1
PROA	230	PROA	254	8.75	4.37498	0	4.14166	0	5.03033	0	1
PROA	230	PROA	255	11.75	7.58344	0	8.47735	0	8.90378	0	1
PROA	230	PROA	281	9.25	7.38046	0	9.33404	0.084042	10.0679	0.817932	1
PROA	231	PROA	252	7.25	6.37242	0	5.81123	0	6.2131	0	1
PROA	231	PROA	253	8.75	4.60758	0	4.52243	0	4.73244	0	1
PROA	231	PROA	254	7.25	6.90546	0	6.94666	0	7.99528	0.745284	1
PROA	231	PROA	255	10.75	9.71251	0	10.2893	0	10.0032	0	1
PROA	231	PROA	259	7.75	11.1343	3.38429	9.79678	2.04678	9.99581	2.24581	1
PROA	231	PROA	260	10.75	10.9368	0.18677	9.8888	0	9.22563	0	1
PROA	231	PROA	280	10.25	6.47622	0	6.8247	0	6.53811	0	1
PROA	231	PROA	281	7.75	4.33815	0	5.36659	0	4.33395	0	1
PROA	231	PROA	282	7.25	5.33965	0	6.30932	0	4.51632	0	1
PROA	231	PROA	285	10.75	9.12003	0	7.52532	0	7.74467	0	1
PROA	232	PROA	254	10.75	9.84749	0	9.27854	0	9.16658	0	1
PROA	232	PROA	280	7.75	5.15306	0	6.11062	0	7.75213	0.002129	1
PROA	232	PROA	281	9.75	5.44829	0	8.19036	0	8.99663	0	1
PROA	232	PROA	282	9.25	7.34285	0	9.36598	0.115976	9.71453	0.464527	1
PROA	233	PROA	237	6.25	6.00221	0	4.07498	0	4.21134	0	1
PROA	233	PROA	238	7.25	7.69976	0.449756	6.49749	0	7.10989	0	1
PROA	233	PROA	241	10.25	11.1056	0.85562	9.37806	0	10.0355	0	1
PROA	233	PROA	252	11.25	9.85628	0	9.64641	0	11.2068	0	1
PROA	233	PROA	280	8.75	5.67996	0	7.75822	0	8.97099	0.220989	1
PROA	233	PROA	281	7.25	5.4859	0	7.47122	0.221218	9.10092	1.85092	1
PROA	234	PROA	238	9.25	6.73279	0	7.57863	0	9.23225	0	1
PROA	234	PROA	276	11.25	7.68029	0	8.17742	0	11.6976	0.447642	1
PROA	234	PROA	277	8.75	6.38494	0	6.47114	0	8.07773	0	1
PROA	234	PROA	278	7.75	6.64542	0	7.32725	0	7.44816	0	1
PROA	234	PROA	279	8.75	5.70378	0	6.57503	0	7.51114	0	1
PROA	234	PROA	280	7.75	4.7368	0	6.61995	0	6.06417	0	1
PROA	234	PROA	281	9.25	5.53068	0	8.11505	0	9.11041	0	1
PROA	235	PROA	239	8.25	5.84569	0	6.8857	0	8.61799	0.367994	1
PROA	235	PROA	262	10.25	11.1817	0.931709	9.19249	0	8.48995	0	1
PROA	235	PROA	267	8.25	8.48946	0.239462	6.88759	0	6.69011	0	1
PROA	235	PROA	270	7.75	8.35955	0.609554	5.6495	0	5.37186	0	1
PROA	235	PROA	271	8.25	8.90129	0.651292	7.72921	0	5.2258	0	1
PROA	235	PROA	275	10.75	5.51735	0	5.16142	0	7.24654	0	1
PROA	235	PROA	276	7.25	5.63804	0	5.18441	0	7.10862	0	1
PROA	235	PROA	277	8.25	6.08138	0	7.60777	0	7.56647	0	1
PROA	235	PROA	278	9.75	7.46837	0	8.72058	0	9.18302	0	1
PROA	235	PROA	279	7.25	5.7833	0	4.52625	0	4.07339	0	1
PROA	235	PROA	280	9.25	6.67179	0	8.22269	0	8.12354	0	1
PROA	235	PROA	281	7.25	6.33031	0	6.73851	0	8.40857	1.15857	1
PROA	235	PROA	283	10.75	5.25583	0	4.48192	0	4.036	0	1
PROA	235	PROA	284	8.25	8.42051	0.170509	7.89025	0	8.78307	0.533065	1
PROA	236	PROA	240	8.25	7.77581	0	9.32699	1.07699	11.9316	3.6816	1
PROA	236	PROA	271	10.75	9.39052	0	9.35917	0	9.49844	0	1
PROA	236	PROA	276	10.75	6.81886	0	8.14407	0	10.9213	0.171317	1
PROA	236	PROA	277	7.25	6.16672	0	6.05545	0	5.45235	0	1
PROA	236	PROA	278	9.75	8.85445	0	9.86081	0.110814	8.05219	0	1
PROA	237	PROA	241	8.25	8.31379	0.063787	8.26332	0.013317	9.71424	1.46424	1
PROA	237	PROA	281	10.75	9.51472	0	9.87574	0	12.1661	1.41613	1
PROA	238	PROA	242	8.25	6.97684	0	7.62519	0	10.1196	1.86964	1
PROA	238	PROA	248	11.75	10.6257	0	11.4502	0	12.4867	0.736663	1
PROA	238	PROA	250	8.25	10.3125	2.06251	8.54359	0.293594	8.41281	0.16281	1
PROA	238	PROA	252	11.75	11.0055	0	10.3557	0	10.7934	0	1
PROA	238	PROA	262	9.25	11.6374	2.38742	8.86279	0	8.32335	0	1
PROA	238	PROA	267	8.75	9.69176	0.941759	7.4677	0	6.90937	0	1
PROA	238	PROA	281	8.75	9.41927	0.669267	9.06425	0.314254	9.91683	1.16683	1
PROA	238	PROA	284	10.75	11.9762	1.22617	11.8565	1.10651	12.7298	1.97984	1
PROA	239	PROA	243	8.25	5.84289	0	5.97883	0	8.62341	0.373411	1
PROA	239	PROA	264	10.75	10.7512	0.001235	12.8695	2.11952	15.0444	4.29438	1
PROA	239	PROA	267	8.25	8.17213	0	8.3176	0.067595	9.85614	1.60614	1
PROA	239	PROA	268	9.25	8.06148	0	9.3726	0.122598	10.669	1.41898	1
PROA	239	PROA	271	8.75	7.97355	0	6.78167	0	6.6269	0	1
PROA	239	PROA	276	10.75	8.88499	0	9.74581	0	13.3862	2.63623	1
PROA	239	PROA	277	12.25	10.0468	0	10.4534	0	10.9149	0	1
PROA	240	PROA	244	8.25	7.30278	0	7.84507	0	9.08679	0.836791	1
PROA	241	PROA	245	10.25	5.94772	0	6.60509	0	7.87026	0	1
PROA	241	PROA	246	6.25	5.91516	0	5.40057	0	5.8891	0	1
PROA	241	PROA	247	11.25	8.32522	0	9.44935	0	8.97589	0	1
PROA	241	PROA	248	10.25	8.87103	0	9.98194	0	9.66551	0	1
PROA	241	PROA	250	11.25	7.63523	0	5.83792	0	4.4437	0	1
PROA	242	PROA	246	8.25	4.91152	0	6.12529	0	9.3665	1.1165	1
PROA	242	PROA	247	9.75	5.94974	0	7.52008	0	10.821	1.07105	1
PROA	242	PROA	248	8.75	6.00192	0	5.8726	0	5.53311	0	1
PROA	242	PROA	250	10.75	6.90293	0	4.8982	0	5.28616	0	1
PROA	242	PROA	264	8.25	6.46933	0	5.6756	0	4.48689	0	1
PROA	242	PROA	267	9.25	8.17526	0	6.84521	0	7.45692	0	1
PROA	242	PROA	268	11.75	8.66802	0	8.74399	0	8.08711	0	1
PROA	243	PROA	264	11.75	8.39623	0	8.95426	0	8.39734	0	1
PROA	246	PROA	264	11.25	10.9641	0	11.5676	0.317634	12.1367	0.88672	1
PROA	249	PROA	264	9.25	8.05874	0	9.13453	0	6.90079	0	1
PROA	250	PROA	261	9.25	6.79366	0	7.23676	0	7.13726	0	1
PROA	250	PROA	262	7.25	5.85417	0	4.84146	0	6.54728	0	1
PROA	250	PROA	263	9.75	5.09789	0	5.58705	0	6.88827	0	1
PROA	250	PROA	264	9.25	6.31754	0	5.9518	0	4.85685	0	1
PROA	250	PROA	266	10.75	9.90136	0	8.34425	0	10.4217	0	1
PROA	250	PROA	267	8.75	9.22701	0.477011	6.74629	0	6.42272	0	1
PROA	250	PROA	281	11.25	12.2767	1.02666	11.5545	0.304465	12.9267	1.67673	1
PROA	250	PROA	284	11.25	12.0765	0.826456	12.3281	1.07806	13.9142	2.66416	1
PROA	250	PROA	285	11.25	11.9482	0.698186	12.1522	0.902179	13.5781	2.32811	1
PROA	251	PROA	258	7.75	7.45081	0	5.72597	0	6.3124	0	1
PROA	251	PROA	259	10.25	9.07032	0	8.60215	0	9.59989	0	1
PROA	251	PROA	260	9.25	7.17525	0	7.91776	0	7.68864	0	1
PROA	251	PROA	261	7.25	4.87836	0	5.82811	0	4.17805	0	1
PROA	251	PROA	262	9.75	5.35583	0	5.95705	0	7.19984	0	1
PROA	252	PROA	258	9.25	7.17962	0	7.12639	0	7.94586	0	1
PROA	252	PROA	259	7.25	7.97454	0.724536	6.30894	0	6.39091	0	1
PROA	252	PROA	260	6.25	6.40357	0.153569	5.38269	0	4.00054	0	1
PROA	252	PROA	261	9.75	6.27664	0	7.64623	0	7.91944	0	1
PROA	252	PROA	262	8.25	6.71247	0	5.78803	0	5.45121	0	1
PROA	252	PROA	281	7.25	7.34112	0.091119	6.13474	0	5.93567	0	1
PROA	252	PROA	282	10.75	5.73939	0	4.83477	0	4.37534	0	1
PROA	252	PROA	284	10.75	8.90369	0	9.45628	0	9.84966	0	1
PROA	252	PROA	285	7.75	7.50673	0	5.67964	0	5.23084	0	1
PROA	253	PROA	257	8.25	6.22983	0	6.58107	0	7.17653	0	1
PROA	253	PROA	259	8.25	9.40036	1.15036	7.17629	0	5.90505	0	1
PROA	253	PROA	281	11.75	7.72152	0	8.24782	0	6.93644	0	1
PROA	254	PROA	280	11.75	12.9759	1.22588	12.9312	1.18118	13.7696	2.01962	1
PROA	254	PROA	281	10.75	10.1255	0	10.7735	0.023454	11.9059	1.15593	1
PROA	254	PROA	282	8.75	8.43094	0	7.96419	0	8.94099	0.190995	1
PROA	258	PROA	288	12.75	7.67755	0	9.75528	0	11.2792	0	1
PROA	259	PROA	281	10.75	12.5387	1.78868	10.6764	0	10.1	0	1
PROA	259	PROA	282	9.75	12.6095	2.85949	11.068	1.31799	10.446	0.696047	1
PROA	259	PROA	285	7.25	7.73496	0.484958	6.92746	0	6.32193	0	1
PROA	259	PROA	288	11.75	4.54788	0	5.47644	0	5.99845	0	1
PROA	260	PROA	281	10.25	10.4107	0.160656	8.05253	0	7.09982	0	1
PROA	260	PROA	282	10.75	10.1441	0	8.70371	0	7.28966	0	1
PROA	260	PROA	284	11.25	8.22921	0	7.60098	0	7.61361	0	1
PROA	260	PROA	285	6.25	5.16221	0	4.11053	0	3.75213	0	1
PROA	260	PROA	286	10.75	5.553	0	4.36575	0	5.36896	0	1
PROA	260	PROA	287	10.25	6.46322	0	7.23372	0	7.59342	0	1
PROA	260	PROA	288	8.25	5.74999	0	7.1082	0	7.32895	0	1
PROA	261	PROA	285	9.25	7.54264	0	9.21883	0	10.8761	1.62614	1
PROA	261	PROA	286	11.75	7.91363	0	7.3592	0	9.33667	0	1
PROA	261	PROA	287	13.25	9.56002	0	10.5793	0	12.2418	0	1
PROA	261	PROA	288	10.75	9.36392	0	11.3427	0.592651	13.854	3.10398	1
PROA	262	PROA	266	7.25	5.7539	0	5.52762	0	6.90991	0	1
PROA	262	PROA	267	7.75	6.17319	0	5.55202	0	5.36535	0	1
PROA	262	PROA	270	10.75	11.2824	0.532396	9.92305	0	9.22674	0	1
PROA	262	PROA	281	9.25	9.94234	0.692337	7.79232	0	7.31059	0	1
PROA	262	PROA	284	8.25	7.28557	0	7.77482	0	7.6899	0	1
PROA	262	PROA	285	7.75	7.08656	0	7.57658	0	7.45372	0	1
PROA	262	PROA	286	10.25	7.92519	0	7.74687	0	6.62989	0	1
PROA	263	PROA	267	9.25	7.08053	0	8.01947	0	8.22415	0	1
PROA	263	PROA	285	11.25	10.8257	0	12.6992	1.44918	13.5987	2.34874	1
PROA	263	PROA	286	10.25	11.0134	0.763355	10.1368	0	9.04273	0	1
PROA	264	PROA	268	8.25	7.51358	0	7.74977	0	10.355	2.105	1
PROA	265	PROA	269	8.25	7.46291	0	7.88879	0	8.64022	0.390224	1
PROA	266	PROA	270	8.25	7.89969	0	7.96045	0	7.71184	0	1
PROA	266	PROA	284	7.75	8.412	0.662	7.26114	0	7.31913	0	1
PROA	266	PROA	285	10.75	9.93688	0	9.92529	0	10.8571	0.107138	1
PROA	266	PROA	286	8.75	9.50624	0.756235	6.92945	0	4.78408	0	1
PROA	267	PROA	271	8.25	7.0247	0	6.63596	0	5.2317	0	1
PROA	267	PROA	276	11.75	9.44281	0	9.23683	0	10.5077	0	1
PROA	267	PROA	284	8.25	7.49289	0	8.30335	0.053346	9.52561	1.27561	1
PROA	268	PROA	272	8.25	6.87187	0	7.16787	0	4.86192	0	1
PROA	269	PROA	273	8.25	7.40395	0	7.72811	0	7.47163	0	1
PROA	269	PROA	274	11.75	9.57796	0	11.8731	0.123115	13.0544	1.30438	1
PROA	269	PROA	275	10.75	9.06391	0	11.2519	0.501879	14.2283	3.47833	1
PROA	270	PROA	274	8.25	6.71636	0	7.92504	0	9.16749	0.917493	1
PROA	270	PROA	275	6.25	6.11772	0	6.92857	0.678571	8.926	2.676	1
PROA	270	PROA	276	7.25	5.47042	0	3.88214	0	4.57594	0	1
PROA	270	PROA	279	8.25	8.73868	0.488678	6.05696	0	6.1661	0	1
PROA	270	PROA	283	10.75	7.90607	0	5.76298	0	3.93294	0	1
PROA	270	PROA	284	7.75	8.35069	0.600691	6.64908	0	7.73302	0	1
PROA	271	PROA	275	8.25	4.8091	0	5.60541	0	5.59082	0	1
PROA	271	PROA	276	7.25	6.35584	0	7.12709	0	8.05476	0.804756	1
PROA	271	PROA	277	11.25	9.5931	0	10.726	0	9.49076	0	1
PROA	271	PROA	279	11.25	11.0034	0	10.2667	0	8.48423	0	1
PROA	271	PROA	284	11.25	11.5135	0.263464	11.4722	0.222196	11.4104	0.160359	1
PROA	272	PROA	276	10.25	8.84189	0	9.58593	0	10.8425	0.592537	1
PROA	273	PROA	277	11.25	9.12334	0	8.96541	0	8.5953	0	1
PROA	274	PROA	278	10.75	9.28127	0	8.79698	0	9.11775	0	1
PROA	275	PROA	279	8.25	8.36474	0.114739	8.38301	0.133012	10.775	2.52497	1
PROA	275	PROA	283	10.75	8.99295	0	8.77321	0	10.1031	0	1
PROA	275	PROA	284	11.75	11.2713	0	12.1059	0.355881	15.4461	3.69606	1
PROA	276	PROA	283	10.75	8.07017	0	7.60605	0	7.23034	0	1
PROA	276	PROA	284	8.25	9.36456	1.11456	7.98984	0	8.43552	0.185518	1
PROA	279	PROA	283	6.25	6.273	0.023002	6.08969	0	4.68717	0	1
PROA	279	PROA	284	7.75	6.6925	0	5.68742	0	5.84865	0	1
PROA	280	PROA	284	9.25	7.76075	0	8.9947	0	8.65622	0	1
PROA	281	PROA	285	8.25	6.93664	0	5.05594	0	5.2248	0	1
PROA	282	PROA	286	12.75	11.4073	0	11.3608	0	10.9649	0	1
PROA	282	PROA	287	11.75	14.3545	2.6045	15.4457	3.69569	14.3866	2.63661	1
Within SpoIVFB chain B
PROB	1	PROB	5	8.25	7.78148	0	8.02123	0	6.49205	0	1
PROB	1	PROB	6	11.75	5.92535	0	5.24584	0	5.12908	0	1
PROB	1	PROB	12	12.75	11.955	0	12.8135	0.063492	11.3082	0	1
PROB	2	PROB	6	8.75	6.93062	0	7.30476	0	8.43151	0	1
PROB	2	PROB	12	9.25	9.05814	0	10.072	0.822033	10.2476	0.997577	1
PROB	2	PROB	13	12.25	8.60011	0	6.7278	0	5.41114	0	1
PROB	3	PROB	7	8.25	7.46952	0	7.4834	0	5.98947	0	1
PROB	3	PROB	10	7.75	7.21188	0	8.19141	0.441407	10.5666	2.81662	1
PROB	3	PROB	11	9.25	5.16133	0	3.79565	0	5.33126	0	1
PROB	3	PROB	12	7.75	6.7261	0	7.86922	0.119219	11.1829	3.43285	1
PROB	4	PROB	8	8.25	8.04825	0	10.538	2.28803	13.1773	4.92734	1
PROB	4	PROB	9	11.75	8.53365	0	10.8348	0	13.9903	2.24031	1
PROB	4	PROB	10	12.75	5.60384	0	6.40841	0	6.14282	0	1
PROB	4	PROB	11	6.75	4.6788	0	6.62935	0	8.39107	1.64107	1
PROB	4	PROB	12	9.75	5.167	0	6.54816	0	5.35001	0	1
PROB	4	PROB	13	7.25	7.02641	0	6.93997	0	5.59678	0	1
PROB	4	PROB	45	12.75	12.3797	0	13.6205	0.870523	13.3483	0.598268	1
PROB	5	PROB	9	8.25	5.99879	0	6.66631	0	8.87624	0.626239	1
PROB	5	PROB	10	9.25	4.26275	0	3.83025	0	4.40295	0	1
PROB	5	PROB	11	6.25	5.33322	0	6.51461	0.264608	8.45254	2.20254	1
PROB	5	PROB	12	12.75	7.53404	0	8.955	0	8.50073	0	1
PROB	5	PROB	45	11.75	11.7965	0.046487	12.3902	0.640187	12.7398	0.989829	1
PROB	6	PROB	10	7.75	7.14382	0	8.53411	0.784105	10.3823	2.63234	1
PROB	6	PROB	11	11.75	7.51773	0	6.8084	0	8.16323	0	1
PROB	7	PROB	11	12.25	8.17857	0	7.06811	0	6.83301	0	1
PROB	7	PROB	45	11.75	9.6623	0	7.87866	0	6.17636	0	1
PROB	7	PROB	48	10.75	9.34617	0	6.82135	0	7.03429	0	1
PROB	7	PROB	49	8.75	9.38248	0.632483	8.35624	0	7.90356	0	1
PROB	7	PROB	52	7.75	9.65317	1.90317	7.4303	0	7.80012	0.050121	1
PROB	7	PROB	58	11.25	10.7082	0	9.37902	0	10.8984	0	1
PROB	8	PROB	48	10.75	10.3905	0	9.97634	0	10.932	0.181969	1
PROB	8	PROB	49	11.75	11.3276	0	12.5175	0.767526	13.4117	1.66173	1
PROB	8	PROB	52	10.75	10.1938	0	8.87027	0	9.67022	0	1
PROB	8	PROB	58	12.25	9.1956	0	9.36053	0	11.2252	0	1
PROB	8	PROB	59	10.75	9.09558	0	10.6182	0	11.2702	0.520244	1
PROB	9	PROB	44	11.25	10.7546	0	9.24139	0	10.4703	0	1
PROB	9	PROB	45	8.75	9.63387	0.883867	9.09831	0.348306	9.29238	0.542384	1
PROB	9	PROB	48	6.75	7.37183	0.621829	4.88866	0	4.90541	0	1
PROB	9	PROB	49	10.75	9.27214	0	8.97764	0	8.46454	0	1
PROB	9	PROB	51	11.75	9.55604	0	7.28879	0	6.28117	0	1
PROB	9	PROB	52	11.25	8.31696	0	6.45367	0	5.50187	0	1
PROB	9	PROB	58	8.25	5.76361	0	4.37903	0	4.76457	0	1
PROB	9	PROB	59	8.25	6.22179	0	7.96977	0	8.93549	0.685493	1
PROB	9	PROB	60	9.25	6.39642	0	7.95628	0	9.20761	0	1
PROB	9	PROB	61	7.75	7.18724	0	5.92648	0	6.75756	0	1
PROB	10	PROB	48	11.25	9.34036	0	9.49777	0	11.7858	0.535823	1
PROB	10	PROB	59	8.75	6.7433	0	7.69968	0	10.7168	1.9668	1
PROB	10	PROB	60	6.75	5.26964	0	5.95238	0	5.41789	0	1
PROB	10	PROB	61	9.25	5.74421	0	6.41902	0	8.67402	0	1
PROB	11	PROB	41	8.75	8.95682	0.206822	7.90375	0	6.57094	0	1
PROB	11	PROB	44	7.75	8.3549	0.604904	6.14935	0	6.39702	0	1
PROB	11	PROB	45	9.75	8.73462	0	7.60844	0	5.73253	0	1
PROB	11	PROB	48	10.25	9.21515	0	7.03273	0	6.1862	0	1
PROB	11	PROB	60	9.75	6.63867	0	8.40331	0	9.72452	0	1
PROB	11	PROB	61	6.75	4.83498	0	4.36066	0	4.22052	0	1
PROB	11	PROB	62	9.75	6.26484	0	8.26592	0	9.04543	0	1
PROB	11	PROB	63	8.75	7.26983	0	6.79566	0	5.73895	0	1
PROB	12	PROB	60	8.75	7.7836	0	6.80818	0	5.71239	0	1
PROB	12	PROB	61	9.25	6.02182	0	6.27487	0	7.40788	0	1
PROB	12	PROB	62	6.75	5.19221	0	5.20979	0	5.43289	0	1
PROB	12	PROB	63	9.25	5.79663	0	6.07316	0	8.33255	0	1
PROB	13	PROB	17	10.75	7.17545	0	5.90729	0	5.8867	0	1
PROB	13	PROB	18	8.25	7.98225	0	7.35329	0	5.68915	0	1
PROB	13	PROB	37	11.75	9.73212	0	8.2476	0	7.11667	0	1
PROB	13	PROB	40	11.25	10.0146	0	8.77243	0	8.27905	0	1
PROB	13	PROB	41	11.75	9.04496	0	8.31927	0	7.57392	0	1
PROB	13	PROB	44	11.75	10.9298	0	9.65891	0	9.7042	0	1
PROB	13	PROB	62	9.75	6.82309	0	9.03404	0	10.4809	0.730854	1
PROB	13	PROB	63	7.25	5.2302	0	5.04154	0	4.94688	0	1
PROB	13	PROB	64	9.75	7.57695	0	9.67616	0	9.80448	0.054485	1
PROB	13	PROB	65	11.75	10.1161	0	11.2836	0	10.2969	0	1
PROB	14	PROB	18	8.75	6.72414	0	7.36993	0	8.45568	0	1
PROB	14	PROB	40	11.25	11.3656	0.115617	9.75546	0	9.7295	0	1
PROB	14	PROB	62	8.25	7.48594	0	6.90764	0	6.08583	0	1
PROB	14	PROB	63	8.75	5.99458	0	5.83138	0	6.73424	0	1
PROB	14	PROB	64	7.25	6.43135	0	5.93952	0	4.69118	0	1
PROB	14	PROB	65	9.25	8.89845	0	8.14297	0	7.88074	0	1
PROB	14	PROB	66	11.25	11.6187	0.368733	11.0602	0	12.2169	0.966918	1
PROB	14	PROB	67	11.75	13.3272	1.57721	12.2127	0.462717	11.5252	0	0	included during modeling only for chain A (slightly different conformation with Pro-sK bound)
PROB	14	PROB	68	11.25	11.0835	0	10.2077	0	9.21642	0	1
PROB	15	PROB	19	8.25	6.19131	0	6.61086	0	7.67325	0	1
PROB	15	PROB	64	10.75	9.02454	0	10.6814	0	9.73073	0	1
PROB	15	PROB	65	12.25	10.3933	0	11.1598	0	10.2013	0	1
PROB	16	PROB	20	8.25	6.36399	0	6.6868	0	5.42112	0	1
PROB	16	PROB	64	10.25	7.3752	0	6.92768	0	7.97601	0	1
PROB	16	PROB	65	6.25	7.72167	1.47167	6.01341	0	4.65513	0	1
PROB	16	PROB	66	10.75	11.026	0.276036	10.0413	0	8.6522	0	1
PROB	17	PROB	21	8.25	6.03964	0	6.1621	0	7.34863	0	1
PROB	17	PROB	36	10.75	9.37602	0	8.27345	0	8.86607	0	1
PROB	17	PROB	37	9.25	7.82777	0	6.67924	0	5.78829	0	1
PROB	17	PROB	40	9.25	9.6754	0.4254	7.00504	0	5.50928	0	1
PROB	17	PROB	63	10.75	7.90345	0	6.01754	0	6.14254	0	1
PROB	17	PROB	64	7.75	6.82406	0	7.55196	0	7.07216	0	1
PROB	17	PROB	65	8.25	6.54774	0	6.45155	0	4.85638	0	1
PROB	17	PROB	66	11.25	10.3099	0	10.9044	0	9.93036	0	1
PROB	18	PROB	22	8.25	6.07719	0	6.51971	0	9.15959	0.909591	1
PROB	19	PROB	23	8.25	6.15251	0	6.46724	0	6.17449	0	1
PROB	19	PROB	65	11.75	10.8567	0	9.90104	0	10.279	0	1
PROB	20	PROB	24	8.25	6.24188	0	6.83314	0	7.21563	0	1
PROB	20	PROB	33	10.25	7.63819	0	7.23193	0	7.55245	0	1
PROB	20	PROB	36	9.75	9.27775	0	6.89955	0	7.20177	0	1
PROB	20	PROB	37	10.75	9.32722	0	8.55441	0	8.36688	0	1
PROB	20	PROB	40	10.75	12.3211	1.57112	9.78945	0	9.96261	0	1
PROB	20	PROB	64	11.75	10.7345	0	10.7732	0	11.5399	0	1
PROB	20	PROB	65	8.75	8.9496	0.1996	6.79847	0	6.71847	0	1
PROB	20	PROB	66	11.75	12.6471	0.897135	11.8322	0.082177	10.2755	0	1
PROB	21	PROB	25	8.25	5.9157	0	5.86241	0	5.22466	0	1
PROB	21	PROB	30	12.25	7.92394	0	8.96368	0	9.06256	0	1
PROB	21	PROB	33	7.75	5.90523	0	5.30526	0	4.11764	0	1
PROB	21	PROB	36	10.75	8.99858	0	8.32804	0	9.05729	0	1
PROB	21	PROB	37	9.25	8.41323	0	7.03457	0	5.64114	0	1
PROB	21	PROB	65	11.75	11.2566	0	11.1391	0	10.9247	0	1
PROB	22	PROB	26	8.25	6.06076	0	5.96481	0	5.06935	0	1
PROB	23	PROB	27	8.25	6.31605	0	6.11679	0	6.31961	0	1
PROB	23	PROB	29	10.75	7.60718	0	7.12623	0	9.02623	0	1
PROB	23	PROB	33	10.75	8.36765	0	7.94655	0	9.40651	0	1
PROB	24	PROB	28	10.25	6.28223	0	6.28223	0	6.28223	0	1
PROB	24	PROB	29	6.25	4.33856	0	4.02421	0	5.84349	0	1
PROB	24	PROB	30	9.75	4.88033	0	5.72068	0	7.17241	0	1
PROB	24	PROB	32	6.25	6.41812	0.168123	6.04282	0	6.04282	0	1
PROB	24	PROB	33	6.25	5.11424	0	4.16823	0	4.93307	0	1
PROB	24	PROB	36	8.75	9.3259	0.575899	8.15488	0	7.94907	0	1
PROB	24	PROB	37	11.25	10.4914	0	10.1052	0	9.25047	0	1
PROB	25	PROB	29	9.25	6.0984	0	7.98834	0	10.3465	1.09654	1
PROB	25	PROB	30	7.75	5.05091	0	5.4979	0	5.01672	0	1
PROB	25	PROB	33	8.75	7.12195	0	5.93118	0	5.14403	0	1
PROB	27	PROB	32	10.75	10.1545	0	9.03067	0	8.93547	0	1
PROB	28	PROB	32	11.25	8.32598	0	8.30986	0	8.30986	0	1
PROB	28	PROB	110	11.75	13.1916	1.44165	13.0364	1.28638	12.7209	0.970926	1
PROB	28	PROB	111	10.75	11.9778	1.22776	10.9471	0.197091	11.4433	0.693253	1
PROB	28	PROB	113	10.75	11.7571	1.00711	11.1626	0.412648	12.9385	2.18846	1
PROB	28	PROB	114	11.75	10.1934	0	9.52252	0	9.59894	0	1
PROB	29	PROB	33	8.25	6.17707	0	6.21863	0	9.73842	1.48842	1
PROB	29	PROB	110	12.75	12.5197	0	13.1028	0.352758	13.9906	1.24063	1
PROB	29	PROB	113	11.75	10.224	0	10.4512	0	11.6557	0	1
PROB	29	PROB	114	11.25	8.05731	0	8.46119	0	9.52797	0	1
PROB	29	PROB	117	11.25	10.1564	0	8.40399	0	7.67575	0	1
PROB	30	PROB	34	8.25	5.95861	0	6.39757	0	5.15932	0	1
PROB	31	PROB	35	8.25	7.2211	0	7.7288	0	9.62394	1.37394	1
PROB	31	PROB	104	13.25	13.3679	0.117892	12.9645	0	14.7731	1.52311	1
PROB	31	PROB	110	10.75	8.37334	0	8.12123	0	8.65597	0	1
PROB	31	PROB	111	10.75	8.15454	0	7.32844	0	6.61231	0	1
PROB	31	PROB	113	11.25	7.7428	0	6.8231	0	8.00502	0	1
PROB	31	PROB	114	7.25	4.72847	0	3.65595	0	4.83023	0	1
PROB	31	PROB	117	11.25	8.54347	0	6.94232	0	7.98184	0	1
PROB	32	PROB	36	8.25	5.91158	0	5.55841	0	4.68475	0	1
PROB	32	PROB	110	11.75	11.076	0	11.3198	0	11.1071	0	1
PROB	32	PROB	111	11.75	11.1815	0	12.039	0.288954	13.0085	1.25849	1
PROB	32	PROB	113	10.25	9.27438	0	9.86139	0	11.9711	1.72113	1
PROB	32	PROB	114	7.25	6.125	0	6.72685	0	7.17698	0	1
PROB	32	PROB	117	7.25	7.13988	0	5.60361	0	5.84858	0	1
PROB	32	PROB	118	10.75	6.82917	0	7.06334	0	7.88813	0	1
PROB	32	PROB	121	10.75	9.49195	0	7.81617	0	6.09118	0	1
PROB	33	PROB	37	8.25	6.10348	0	6.41277	0	4.64975	0	1
PROB	33	PROB	65	12.25	11.7378	0	12.274	0.023969	11.8435	0	1
PROB	34	PROB	38	8.25	6.34351	0	6.4162	0	8.03369	0	1
PROB	35	PROB	39	8.25	6.44675	0	6.83711	0	8.17717	0	1
PROB	35	PROB	97	11.75	9.79112	0	8.70044	0	7.8469	0	1
PROB	35	PROB	101	9.25	9.14282	0	7.32144	0	7.13759	0	1
PROB	35	PROB	104	11.25	12.0275	0.777497	9.9735	0	9.50973	0	1
PROB	35	PROB	110	12.25	10.863	0	8.59978	0	7.34259	0	1
PROB	35	PROB	114	8.25	8.46298	0.212983	6.70142	0	6.24282	0	1
PROB	35	PROB	115	10.75	8.21832	0	7.67185	0	6.43378	0	1
PROB	35	PROB	117	9.75	9.31827	0	7.58326	0	8.75909	0	1
PROB	35	PROB	118	7.25	6.57767	0	4.06786	0	3.80177	0	1
PROB	35	PROB	121	9.75	9.59429	0	7.58939	0	8.73123	0	1
PROB	36	PROB	40	8.25	6.52656	0	6.73177	0	7.85024	0	1
PROB	36	PROB	65	12.25	8.88382	0	8.55118	0	9.48305	0	1
PROB	36	PROB	66	12.25	11.1079	0	11.9686	0	11.0453	0	1
PROB	36	PROB	117	10.75	9.75101	0	9.13517	0	8.8131	0	1
PROB	36	PROB	118	9.75	7.24879	0	7.6018	0	6.61411	0	1
PROB	36	PROB	121	8.25	8.15807	0	6.79291	0	5.26291	0	1
PROB	36	PROB	125	10.75	11.1649	0.414948	10.3684	0	9.31957	0	1
PROB	37	PROB	41	8.25	5.9269	0	5.75269	0	7.5529	0	1
PROB	37	PROB	63	11.75	9.04926	0	8.06326	0	8.07307	0	1
PROB	37	PROB	65	12.25	8.52418	0	10.1162	0	9.70462	0	1
PROB	37	PROB	66	12.75	11.0755	0	13.6021	0.852064	13.6795	0.929488	1
PROB	38	PROB	42	8.25	5.56049	0	5.65136	0	5.40872	0	1
PROB	38	PROB	97	10.25	8.61777	0	6.57806	0	4.77751	0	1
PROB	38	PROB	100	10.75	11.6472	0.897178	9.28047	0	8.33542	0	1
PROB	38	PROB	101	11.75	11.0127	0	9.15797	0	9.00784	0	1
PROB	38	PROB	118	11.75	10.1197	0	8.40768	0	6.87985	0	1
PROB	39	PROB	43	8.25	6.01407	0	6.28267	0	7.54116	0	1
PROB	39	PROB	93	10.75	8.28407	0	8.08538	0	9.2201	0	1
PROB	39	PROB	94	9.25	6.76392	0	6.41859	0	4.90423	0	1
PROB	39	PROB	97	8.25	7.36295	0	5.88458	0	5.4854	0	1
PROB	39	PROB	101	10.75	10.6599	0	9.1514	0	9.11041	0	1
PROB	39	PROB	118	8.75	8.82746	0.077464	7.47628	0	5.47345	0	1
PROB	39	PROB	121	9.25	9.06524	0	6.76047	0	9.08822	0	1
PROB	39	PROB	122	8.25	7.4909	0	5.7232	0	4.12038	0	1
PROB	39	PROB	125	9.25	9.35918	0.109177	6.65716	0	5.54828	0	1
PROB	40	PROB	44	8.25	6.47865	0	6.79417	0	6.97816	0	1
PROB	40	PROB	63	8.25	6.82708	0	5.26077	0	5.17265	0	1
PROB	40	PROB	64	11.75	7.56589	0	7.69001	0	8.42951	0	1
PROB	40	PROB	65	12.25	7.01286	0	7.21514	0	6.82722	0	1
PROB	40	PROB	66	11.75	7.91606	0	8.98116	0	9.29781	0	1
PROB	40	PROB	67	10.25	7.86354	0	8.04444	0	7.66631	0	1
PROB	40	PROB	68	7.25	6.49647	0	6.6135	0	6.31428	0	1
PROB	40	PROB	125	9.75	10.2587	0.508701	9.45062	0	8.46319	0	1
PROB	41	PROB	45	8.25	6.19958	0	6.14078	0	4.75996	0	1
PROB	41	PROB	63	9.25	7.11423	0	6.72244	0	5.84564	0	1
PROB	41	PROB	68	10.75	7.89204	0	9.35723	0	10.0947	0	1
PROB	42	PROB	46	8.25	5.90615	0	6.54515	0	6.52686	0	1
PROB	42	PROB	90	11.25	8.81523	0	9.05284	0	8.99431	0	1
PROB	42	PROB	93	7.25	6.62226	0	4.93453	0	4.65234	0	1
PROB	42	PROB	94	10.75	7.86399	0	7.97766	0	7.37778	0	1
PROB	42	PROB	96	10.25	9.69518	0	7.65002	0	6.62507	0	1
PROB	42	PROB	97	8.75	8.24021	0	5.62295	0	4.86819	0	1
PROB	42	PROB	122	11.75	11.9384	0.188352	10.2537	0	9.10596	0	1
PROB	43	PROB	47	8.25	6.68909	0	7.07953	0	4.92271	0	1
PROB	43	PROB	68	10.25	6.55774	0	5.55659	0	4.82446	0	1
PROB	43	PROB	89	11.25	7.85501	0	8.58707	0	7.87153	0	1
PROB	43	PROB	90	7.75	5.59735	0	5.57439	0	4.29047	0	1
PROB	43	PROB	93	7.25	5.87916	0	5.35695	0	7.48629	0.236289	1
PROB	43	PROB	94	9.25	6.82996	0	6.80324	0	5.16435	0	1
PROB	43	PROB	97	10.75	9.4939	0	8.752	0	10.7955	0.045482	1
PROB	43	PROB	122	10.75	11.0612	0.311169	10.1486	0	10.6277	0	1
PROB	43	PROB	125	9.25	10.8077	1.55771	8.28929	0	7.87275	0	1
PROB	43	PROB	126	11.75	10.842	0	10.3716	0	10.3004	0	1
PROB	43	PROB	129	9.75	11.582	1.83197	9.20011	0	6.76782	0	1
PROB	44	PROB	48	8.25	6.15167	0	5.99555	0	6.80518	0	1
PROB	44	PROB	61	7.75	7.07583	0	5.11186	0	4.46236	0	1
PROB	44	PROB	62	11.75	7.89356	0	7.94265	0	8.15694	0	1
PROB	44	PROB	63	8.25	7.35428	0	5.88445	0	4.87676	0	1
PROB	44	PROB	67	11.25	8.49454	0	8.66828	0	7.25799	0	1
PROB	44	PROB	68	7.25	5.47243	0	5.25524	0	3.62941	0	1
PROB	44	PROB	69	10.75	7.21757	0	8.0725	0	6.67077	0	1
PROB	44	PROB	70	8.75	7.32562	0	7.13268	0	5.71047	0	1
PROB	45	PROB	49	8.25	5.6518	0	5.70754	0	6.62232	0	1
PROB	45	PROB	61	9.75	8.78406	0	8.34894	0	7.71977	0	1
PROB	45	PROB	93	10.25	8.86452	0	7.61699	0	8.1353	0	1
PROB	46	PROB	50	8.25	6.48811	0	6.35306	0	5.93218	0	1
PROB	46	PROB	86	10.25	7.76792	0	8.28684	0	8.05983	0	1
PROB	46	PROB	89	6.25	5.75619	0	4.81088	0	4.81088	0	1
PROB	46	PROB	90	6.75	6.33582	0	6.33582	0	6.33582	0	1
PROB	46	PROB	91	10.75	9.1114	0	10.4212	0	9.83688	0	1
PROB	46	PROB	92	10.25	8.23696	0	7.81694	0	8.87998	0	1
PROB	46	PROB	93	6.75	6.24429	0	5.03239	0	4.04462	0	1
PROB	46	PROB	94	11.25	9.362	0	10.0914	0	9.28116	0	1
PROB	47	PROB	51	8.25	6.29086	0	6.23635	0	8.02424	0	1
PROB	47	PROB	58	9.75	9.50247	0	7.84586	0	9.03908	0	1
PROB	47	PROB	61	10.25	9.25427	0	7.61692	0	8.6286	0	1
PROB	47	PROB	68	10.25	8.89678	0	7.6495	0	7.16529	0	1
PROB	47	PROB	70	7.25	7.12833	0	4.46812	0	4.9627	0	1
PROB	47	PROB	72	11.25	10.3305	0	8.87297	0	10.1443	0	1
PROB	47	PROB	86	7.75	5.35149	0	5.35339	0	5.20115	0	1
PROB	47	PROB	87	11.75	7.1344	0	7.99247	0	6.18771	0	1
PROB	47	PROB	89	7.25	6.04713	0	5.70163	0	4.99445	0	1
PROB	47	PROB	90	8.75	6.38959	0	6.22309	0	4.32085	0	1
PROB	47	PROB	129	12.75	14.003	1.25296	12.1557	0	9.37349	0	1
PROB	48	PROB	52	8.25	6.16404	0	6.32203	0	6.67111	0	1
PROB	48	PROB	58	7.25	6.86067	0	5.45467	0	5.43565	0	1
PROB	48	PROB	60	11.75	9.20294	0	9.97168	0	11.6778	0	1
PROB	48	PROB	61	7.25	7.71725	0.467247	5.59547	0	5.09044	0	1
PROB	48	PROB	70	7.25	7.29567	0.045671	6.8296	0	6.27322	0	1
PROB	48	PROB	72	11.25	9.23984	0	9.58166	0	10.0035	0	1
PROB	49	PROB	53	8.25	6.31029	0	6.6128	0	5.37667	0	1
PROB	49	PROB	89	10.25	9.36521	0	7.59727	0	7.59727	0	1
PROB	50	PROB	54	8.25	6.22662	0	6.2211	0	6.19777	0	1
PROB	50	PROB	56	10.75	9.21201	0	9.01255	0	9.76793	0	1
PROB	50	PROB	82	10.75	8.54816	0	7.86159	0	9.47459	0	1
PROB	50	PROB	85	6.75	7.22198	0.471978	5.20341	0	5.13133	0	1
PROB	50	PROB	86	6.75	5.81689	0	4.9294	0	5.54363	0	1
PROB	50	PROB	88	10.25	10.1815	0	9.02094	0	8.65608	0	1
PROB	50	PROB	89	6.75	7.84692	1.09692	5.16259	0	4.3561	0	1
PROB	50	PROB	90	10.75	10.2658	0	9.2756	0	8.77016	0	1
PROB	51	PROB	55	10.25	6.66602	0	8.75287	0	8.76387	0	1
PROB	51	PROB	56	6.25	5.64482	0	4.69139	0	5.73324	0	1
PROB	51	PROB	57	9.75	6.95933	0	7.8183	0	9.06827	0	1
PROB	51	PROB	58	7.25	6.72064	0	4.78029	0	4.19377	0	1
PROB	51	PROB	61	11.25	11.1768	0	9.14447	0	8.69184	0	1
PROB	51	PROB	70	9.75	9.25441	0	6.80067	0	6.42448	0	1
PROB	51	PROB	72	7.25	8.17194	0.921945	6.1026	0	6.28173	0	1
PROB	51	PROB	73	11.25	10.3379	0	10.2756	0	12.1033	0.853281	1
PROB	51	PROB	78	11.75	10.6852	0	9.78911	0	9.45115	0	1
PROB	51	PROB	82	9.25	8.41241	0	8.49708	0	8.82824	0	1
PROB	51	PROB	85	10.75	8.92276	0	9.08997	0	9.08997	0	1
PROB	51	PROB	86	8.75	6.83106	0	5.99634	0	5.42861	0	1
PROB	51	PROB	89	11.25	10.4497	0	9.28459	0	9.28459	0	1
PROB	52	PROB	56	9.25	6.53519	0	8.08735	0	10.3907	1.14071	1
PROB	52	PROB	57	9.25	6.82542	0	8.71791	0	8.31599	0	1
PROB	52	PROB	58	8.75	7.41864	0	7.28512	0	8.02038	0	1
PROB	52	PROB	215	8.25	24.1602	15.9102	25.0357	16.7857	24.6145	16.3645	0	may be satisfied in dimer only structure with CBS domains not tilted to form tetramer
PROB	53	PROB	85	10.25	10.7472	0.497229	8.65683	0	10.0824	0	1
PROB	53	PROB	214	7.75	21.6222	13.8722	21.1693	13.4193	21.5172	13.7672	0	may be satisfied in dimer only structure with CBS domains not tilted to form tetramer
PROB	54	PROB	78	10.25	10.136	0	8.89368	0	11.4708	1.22078	1
PROB	54	PROB	79	11.25	10.4272	0	8.46568	0	8.26475	0	1
PROB	54	PROB	81	10.75	10.9596	0.209635	9.78366	0	10.423	0	1
PROB	54	PROB	82	8.25	7.62436	0	5.06337	0	4.30711	0	1
PROB	54	PROB	85	8.25	9.59949	1.34949	7.0326	0	5.21396	0	1
PROB	54	PROB	86	10.75	9.41191	0	7.66523	0	7.34897	0	1
PROB	55	PROB	74	11.25	7.79866	0	6.8853	0	7.01582	0	1
PROB	55	PROB	75	11.25	9.43782	0	7.99728	0	6.4941	0	1
PROB	55	PROB	76	11.25	11.9489	0.698917	11.5953	0.345318	11.0563	0	1
PROB	55	PROB	77	11.75	11.5444	0	10.6112	0	10.6845	0	1
PROB	55	PROB	78	11.75	9.97024	0	10.2031	0	10.8156	0	1
PROB	56	PROB	72	7.25	6.61534	0	4.94073	0	5.24448	0	1
PROB	56	PROB	73	10.25	6.53377	0	7.48697	0	11.0239	0.773886	1
PROB	56	PROB	74	8.25	4.85671	0	3.86136	0	4.55936	0	1
PROB	56	PROB	75	8.25	7.62614	0	7.96098	0	8.69942	0.449422	1
PROB	56	PROB	76	10.75	9.4382	0	9.07088	0	8.39775	0	1
PROB	56	PROB	77	11.75	9.97657	0	10.043	0	9.58085	0	1
PROB	56	PROB	78	8.75	8.25844	0	6.96457	0	5.25528	0	1
PROB	56	PROB	82	8.25	9.69655	1.44654	7.47938	0	4.92518	0	1
PROB	56	PROB	85	11.25	12.4724	1.22239	10.6407	0	8.60028	0	1
PROB	56	PROB	86	9.25	10.8504	1.60037	8.2272	0	6.43412	0	1
PROB	57	PROB	72	8.75	6.01491	0	7.24377	0	10.1807	1.43067	1
PROB	57	PROB	73	6.25	5.70091	0	5.43524	0	8.74206	2.49206	1
PROB	57	PROB	74	10.25	5.81354	0	6.03205	0	11.3452	1.09524	1
PROB	57	PROB	75	10.75	9.36307	0	9.71143	0	11.8668	1.11683	1
PROB	58	PROB	70	7.75	7.14807	0	6.17477	0	5.16982	0	1
PROB	58	PROB	71	9.25	5.82522	0	6.40056	0	7.51583	0	1
PROB	58	PROB	72	7.75	4.56568	0	5.53312	0	5.27271	0	1
PROB	58	PROB	73	9.75	6.22665	0	7.81672	0	9.55484	0	1
PROB	58	PROB	86	11.25	11.6903	0.440261	9.64075	0	8.16323	0	1
PROB	59	PROB	70	10.75	8.52146	0	9.8388	0	11.8066	1.05655	1
PROB	59	PROB	71	6.25	5.98883	0	5.43039	0	6.76282	0.512821	1
PROB	59	PROB	72	8.25	5.96108	0	7.42548	0	8.61031	0.360308	1
PROB	59	PROB	73	7.25	6.3941	0	4.94284	0	4.21677	0	1
PROB	60	PROB	69	10.25	8.35308	0	8.138	0	11.5075	1.25753	1
PROB	60	PROB	70	9.25	6.5209	0	8.30654	0	11.3203	2.07028	1
PROB	60	PROB	71	6.25	4.96584	0	4.04021	0	5.96739	0	1
PROB	61	PROB	68	8.75	7.53358	0	7.65348	0	7.47739	0	1
PROB	61	PROB	69	9.25	5.95773	0	7.23502	0	7.75798	0	1
PROB	61	PROB	70	7.25	5.15747	0	6.16638	0	5.5201	0	1
PROB	61	PROB	71	9.75	6.02922	0	6.91963	0	8.38117	0	1
PROB	62	PROB	68	8.75	6.05469	0	6.47251	0	8.6313	0	1
PROB	62	PROB	69	6.25	5.20521	0	4.33493	0	5.75778	0	1
PROB	62	PROB	70	9.75	6.78737	0	8.18577	0	8.74122	0	1
PROB	62	PROB	71	10.25	8.00372	0	7.02778	0	5.76666	0	1
PROB	63	PROB	67	9.25	8.3398	0	9.18974	0	9.53631	0.286311	1
PROB	63	PROB	68	7.25	5.37464	0	6.21729	0	6.29622	0	1
PROB	63	PROB	69	9.75	6.87881	0	8.32816	0	9.20294	0	1
PROB	64	PROB	68	9.75	5.77973	0	5.66059	0	6.50998	0	1
PROB	64	PROB	69	9.75	7.55393	0	6.33236	0	6.24128	0	1
PROB	65	PROB	190	11.75	13.8427	2.09267	11.9603	0.210283	10.9987	0	1
PROB	66	PROB	94	12.75	13.127	0.376974	13.1751	0.425077	12.099	0	1
PROB	66	PROB	136	12.75	8.92802	0	7.4203	0	7.52585	0	1
PROB	66	PROB	187	12.25	10.747	0	9.67273	0	7.50335	0	1
PROB	66	PROB	190	8.25	11.2346	2.9846	8.40965	0.159649	6.51476	0	1
PROB	66	PROB	191	11.75	11.7523	0.00232	10.3615	0	9.40187	0	1
PROB	67	PROB	87	11.75	11.0298	0	11.2528	0	10.6528	0	1
PROB	67	PROB	90	8.25	8.51673	0.266734	8.51673	0.266734	8.51673	0.266734	1
PROB	67	PROB	91	11.75	10.1198	0	10.7107	0	10.387	0	1
PROB	67	PROB	94	12.25	11.4208	0	10.5113	0	8.36384	0	1
PROB	67	PROB	129	13.25	9.10562	0	8.44456	0	7.01345	0	1
PROB	67	PROB	136	11.75	6.58637	0	5.33831	0	4.94785	0	1
PROB	67	PROB	137	12.75	8.22288	0	7.61773	0	7.47337	0	1
PROB	67	PROB	190	12.25	12.5587	0.308692	11.4011	0	10.1529	0	1
PROB	68	PROB	87	11.75	11.206	0	11.7658	0.015789	11.1543	0	1
PROB	68	PROB	90	9.25	8.66126	0	8.66126	0	8.66126	0	1
PROB	68	PROB	94	11.75	11.9532	0.203162	11.4904	0	9.29854	0	1
PROB	68	PROB	136	12.75	9.78745	0	8.72058	0	8.603	0	1
PROB	68	PROB	137	12.75	10.5561	0	9.61398	0	9.60633	0	1
PROB	69	PROB	86	12.25	11.6712	0	12.1666	0	12.0856	0	1
PROB	69	PROB	87	12.25	10.8813	0	12.3081	0.058106	11.412	0	1
PROB	69	PROB	90	11.75	10.3105	0	11.7198	0	11.9516	0.201634	1
PROB	69	PROB	136	12.75	10.2482	0	10.1576	0	10.0008	0	1
PROB	69	PROB	137	12.75	10.7875	0	11.0005	0	11.568	0	1
PROB	70	PROB	86	7.25	9.50302	2.25303	6.97513	0	6.39255	0	1
PROB	70	PROB	87	10.75	9.76065	0	9.02082	0	8.43776	0	1
PROB	70	PROB	89	10.25	11.8864	1.63644	9.75242	0	9.38212	0	1
PROB	70	PROB	90	9.25	10.4688	1.21878	9.37062	0.120623	9.15145	0	1
PROB	70	PROB	137	12.75	11.757	0	10.1615	0	10.9261	0	1
PROB	72	PROB	76	12.25	9.11979	0	8.71421	0	8.21664	0	1
PROB	72	PROB	78	10.75	9.56836	0	7.22659	0	4.77398	0	1
PROB	72	PROB	82	11.25	12.0594	0.809418	9.88482	0	10.0889	0	1
PROB	72	PROB	83	11.25	10.544	0	9.05786	0	8.08788	0	1
PROB	72	PROB	86	8.75	10.8687	2.11867	8.03426	0	7.61358	0	1
PROB	72	PROB	140	12.25	14.8287	2.57873	12.3383	0.088281	11.1007	0	1
PROB	74	PROB	78	7.25	7.5454	0.295401	6.3587	0	4.85873	0	1
PROB	74	PROB	82	11.75	12.0712	0.321173	9.26738	0	7.96434	0	1
PROB	75	PROB	140	15.25	19.0028	3.75282	18.4214	3.17145	19.989	4.73903	0	not included in modeling for B/C to allow asymmetric structure
PROB	75	PROB	209	12.75	11.0309	0	11.8498	0	15.1736	2.42364	1
PROB	76	PROB	152	13.25	13.0974	0	11.868	0	12.3574	0	0	not included in modeling for B/C to allow asymmetric structure
PROB	76	PROB	208	11.75	11.155	0	12.0603	0.310253	14.1882	2.43825	1
PROB	76	PROB	209	7.75	7.5361	0	7.28684	0	8.6869	0.936902	1
PROB	76	PROB	212	11.75	10.4538	0	11.0633	0	12.4856	0.735588	1
PROB	76	PROB	213	11.75	8.28616	0	7.10287	0	4.71563	0	1
PROB	76	PROB	214	12.25	8.33034	0	7.93238	0	8.78086	0	1
PROB	77	PROB	152	13.25	12.9742	0	13.334	0.084024	14.7274	1.47736	0	not included in modeling for B/C to allow asymmetric structure
PROB	77	PROB	209	12.75	9.92905	0	11.1322	0	13.5655	0.815538	1
PROB	77	PROB	212	11.75	10.2022	0	11.8884	0.138431	13.1867	1.43668	1
PROB	77	PROB	213	11.75	7.57151	0	7.09662	0	6.91171	0	1
PROB	78	PROB	82	6.25	6.77619	0.526186	5.8283	0	8.68662	2.43662	1
PROB	78	PROB	83	7.75	6.34946	0	4.88353	0	4.38366	0	1
PROB	78	PROB	86	10.25	10.6842	0.434232	8.48545	0	8.51348	0	1
PROB	78	PROB	152	12.25	13.2648	1.01477	12.0716	0	11.0935	0	0	not included in modeling for B/C to allow asymmetric structure
PROB	79	PROB	83	9.25	6.27874	0	7.03165	0	6.95953	0	1
PROB	79	PROB	147	11.75	10.2198	0	10.5725	0	11.4345	0	1
PROB	79	PROB	148	11.75	9.60929	0	10.3238	0	11.179	0	1
PROB	80	PROB	84	8.25	5.97647	0	6.17488	0	9.23882	0.98882	1
PROB	80	PROB	143	10.75	9.49196	0	9.39649	0	8.55418	0	1
PROB	80	PROB	144	6.75	5.7806	0	4.57304	0	4.87122	0	1
PROB	80	PROB	145	10.75	7.48046	0	7.56392	0	7.8619	0	1
PROB	80	PROB	147	7.25	7.7404	0.4904	6.01602	0	5.13464	0	1
PROB	80	PROB	148	7.25	7.40897	0.158975	5.6731	0	6.09342	0	1
PROB	80	PROB	152	11.75	12.8008	1.05077	12.3028	0.552799	11.9785	0.228507	0	not included in modeling for B/C to allow asymmetric structure
PROB	80	PROB	155	11.75	13.9645	2.21446	11.5694	0	10.2393	0	1
PROB	81	PROB	85	8.25	6.35484	0	6.72932	0	8.88401	0.634011	1
PROB	81	PROB	144	10.25	8.15064	0	8.19638	0	9.75717	0	1
PROB	81	PROB	148	10.75	10.0563	0	9.75059	0	8.08964	0	1
PROB	82	PROB	86	8.25	6.11915	0	6.44405	0	8.02699	0	1
PROB	83	PROB	87	8.25	5.98255	0	5.97747	0	7.17565	0	1
PROB	83	PROB	140	7.75	8.57536	0.825358	7.1379	0	8.33778	0.587784	1
PROB	83	PROB	141	10.75	7.74691	0	8.20741	0	9.41847	0	1
PROB	83	PROB	143	10.75	10.1655	0	8.76592	0	8.39755	0	1
PROB	83	PROB	144	7.25	7.38086	0.13086	5.22175	0	4.46243	0	1
PROB	83	PROB	147	10.75	10.8116	0.061627	8.25161	0	7.30069	0	1
PROB	84	PROB	88	8.25	5.94615	0	6.03382	0	4.74975	0	1
PROB	84	PROB	140	11.25	8.06545	0	8.73788	0	11.4713	0.221318	1
PROB	84	PROB	141	8.25	5.78024	0	5.91115	0	4.78324	0	1
PROB	84	PROB	144	6.75	7.02992	0.27992	5.391	0	6.83164	0.081643	1
PROB	84	PROB	145	9.25	8.80562	0	8.37768	0	7.26506	0	1
PROB	84	PROB	148	10.75	11.8903	1.14031	10.5851	0	12.1336	1.38356	1
PROB	85	PROB	89	8.25	6.3112	0	6.55428	0	6.55428	0	1
PROB	86	PROB	90	8.25	7.12294	0	7.95206	0	8.10594	0	1
PROB	87	PROB	91	10.75	7.96907	0	8.50358	0	7.75807	0	1
PROB	87	PROB	129	11.75	10.0264	0	9.32772	0	9.36309	0	1
PROB	87	PROB	130	11.75	11.423	0	12.1705	0.420463	12.2881	0.538052	1
PROB	87	PROB	132	12.25	11.9886	0	9.89564	0	10.8047	0	1
PROB	87	PROB	135	12.75	10.7792	0	10.7225	0	10.9181	0	1
PROB	87	PROB	136	12.25	9.84002	0	9.56129	0	10.434	0	1
PROB	87	PROB	137	8.25	6.58722	0	5.1226	0	5.8362	0	1
PROB	87	PROB	138	10.75	7.23821	0	6.42626	0	6.64876	0	1
PROB	87	PROB	140	7.75	7.03789	0	4.69446	0	4.66318	0	1
PROB	87	PROB	141	6.75	6.76963	0.01963	5.47997	0	5.16472	0	1
PROB	87	PROB	144	9.25	9.81592	0.565922	7.37368	0	6.46491	0	1
PROB	88	PROB	92	8.25	6.33804	0	6.03314	0	4.84395	0	1
PROB	88	PROB	130	11.75	9.55383	0	10.3632	0	9.33996	0	1
PROB	88	PROB	141	9.25	7.42361	0	6.35081	0	5.46191	0	1
PROB	89	PROB	93	8.25	5.97579	0	6.15759	0	5.66235	0	1
PROB	90	PROB	94	8.25	6.92077	0	6.69198	0	5.66358	0	1
PROB	90	PROB	126	10.75	8.93326	0	9.2832	0	8.84385	0	1
PROB	90	PROB	129	7.75	7.96894	0.218936	6.57194	0	6.27644	0	1
PROB	90	PROB	130	11.75	9.99504	0	10.3502	0	9.53156	0	1
PROB	90	PROB	137	10.25	7.63965	0	6.11239	0	5.44631	0	1
PROB	90	PROB	138	11.75	8.69897	0	8.69897	0	8.69897	0	1
PROB	91	PROB	95	8.25	6.32762	0	6.54756	0	7.19388	0	1
PROB	91	PROB	126	7.25	5.99265	0	5.90053	0	6.2528	0	1
PROB	91	PROB	127	11.75	8.9262	0	9.69219	0	11.7021	0	1
PROB	91	PROB	129	6.75	6.06203	0	4.06402	0	5.01933	0	1
PROB	91	PROB	130	7.75	7.15619	0	5.79188	0	5.69763	0	1
PROB	91	PROB	137	11.75	8.18037	0	6.60364	0	4.67874	0	1
PROB	91	PROB	138	11.25	8.00748	0	6.87402	0	6.31214	0	1
PROB	92	PROB	96	8.25	6.21561	0	6.41334	0	10.118	1.868	1
PROB	92	PROB	126	11.25	8.7624	0	9.70826	0	9.09324	0	1
PROB	93	PROB	97	8.25	6.17459	0	6.33243	0	7.96104	0	1
PROB	94	PROB	98	8.25	6.07841	0	6.30242	0	7.25557	0	1
PROB	94	PROB	122	6.75	6.59539	0	5.3635	0	6.21733	0	1
PROB	94	PROB	123	10.25	8.46126	0	8.8127	0	10.4415	0.191488	1
PROB	94	PROB	125	7.75	8.01775	0.267753	5.78454	0	5.02225	0	1
PROB	94	PROB	126	6.75	6.39388	0	4.43972	0	5.77084	0	1
PROB	94	PROB	129	9.25	9.4181	0.168097	6.72291	0	5.59013	0	1
PROB	94	PROB	130	11.75	10.6181	0	8.92691	0	8.88096	0	1
PROB	95	PROB	99	8.25	6.39956	0	6.63035	0	9.15862	0.908616	1
PROB	95	PROB	122	10.25	8.08269	0	8.42758	0	9.57723	0	1
PROB	95	PROB	123	11.25	8.63411	0	10.1915	0	9.72236	0	1
PROB	95	PROB	126	7.75	7.35218	0	6.54683	0	5.11624	0	1
PROB	95	PROB	130	11.25	10.4768	0	8.95304	0	6.83718	0	1
PROB	96	PROB	100	8.25	6.35292	0	6.56007	0	4.87427	0	1
PROB	97	PROB	101	8.25	6.05393	0	6.20481	0	5.98226	0	1
PROB	97	PROB	118	10.25	9.70543	0	8.44725	0	5.78714	0	1
PROB	97	PROB	119	10.75	9.01748	0	9.41937	0	9.8362	0	1
PROB	97	PROB	122	7.25	8.39479	1.14479	6.39236	0	5.89826	0	1
PROB	97	PROB	126	10.75	10.7503	0.000295	9.49344	0	10.7074	0	1
PROB	98	PROB	102	8.25	6.15813	0	6.29916	0	6.94964	0	1
PROB	98	PROB	118	10.75	7.97486	0	8.34022	0	8.15943	0	1
PROB	98	PROB	119	7.25	6.07181	0	5.86976	0	6.60825	0	1
PROB	98	PROB	122	6.25	6.64398	0.393981	4.80259	0	4.87373	0	1
PROB	98	PROB	123	8.25	7.8744	0	7.11863	0	5.03388	0	1
PROB	98	PROB	126	8.75	9.49453	0.744527	7.02994	0	5.17503	0	1
PROB	99	PROB	103	8.25	6.2283	0	6.38068	0	4.44496	0	1
PROB	100	PROB	104	8.25	6.1015	0	6.23649	0	5.56894	0	1
PROB	101	PROB	105	8.25	6.07694	0	6.28588	0	6.28588	0	1
PROB	101	PROB	110	11.75	9.66162	0	8.77502	0	9.02056	0	1
PROB	101	PROB	115	6.75	6.40963	0	5.23053	0	4.83446	0	1
PROB	101	PROB	116	10.25	8.65789	0	9.17193	0	10.4606	0.210581	1
PROB	101	PROB	118	7.25	7.60883	0.358832	5.28797	0	5.31252	0	1
PROB	101	PROB	119	6.75	6.83962	0.08962	5.26009	0	5.16543	0	1
PROB	101	PROB	122	8.75	9.76071	1.01071	6.98228	0	6.53123	0	1
PROB	102	PROB	106	8.25	6.23024	0	6.66561	0	7.97892	0	1
PROB	102	PROB	115	10.25	7.46097	0	7.53351	0	8.392	0	1
PROB	102	PROB	119	8.25	7.36023	0	6.3558	0	4.01146	0	1
PROB	103	PROB	107	8.25	6.08401	0	6.33637	0	7.42611	0	1
PROB	104	PROB	108	10.25	6.61281	0	8.37887	0	8.88875	0	1
PROB	104	PROB	109	6.25	7.0126	0.762597	5.65543	0	5.87882	0	1
PROB	104	PROB	110	6.25	7.28662	1.03662	5.85267	0	6.62438	0.37438	1
PROB	104	PROB	115	7.75	8.06362	0.313618	6.45054	0	5.48061	0	1
PROB	105	PROB	109	9.75	7.64601	0	8.75569	0	9.22094	0	1
PROB	105	PROB	110	7.75	7.07633	0	7.40993	0	8.24507	0.495067	1
PROB	105	PROB	111	10.75	8.03052	0	9.91171	0	10.7502	0.000221	1
PROB	105	PROB	112	7.25	5.87891	0	6.32578	0	5.17893	0	1
PROB	105	PROB	115	6.25	6.29851	0.048508	4.03675	0	4.56246	0	1
PROB	105	PROB	116	9.25	8.02002	0	7.32507	0	7.39183	0	1
PROB	105	PROB	119	8.75	9.61021	0.860209	7.33395	0	6.82451	0	1
PROB	106	PROB	112	11.75	8.54259	0	10.0775	0	9.62527	0	1
PROB	108	PROB	112	11.75	7.28595	0	8.57279	0	7.83901	0	1
PROB	108	PROB	115	11.75	10.4703	0	10.7415	0	9.83597	0	1
PROB	110	PROB	114	7.25	6.95064	0	5.32635	0	5.04645	0	1
PROB	110	PROB	115	7.25	7.43774	0.187738	5.92692	0	4.71556	0	1
PROB	110	PROB	118	11.25	11.6211	0.371111	9.06461	0	9.93428	0	1
PROB	111	PROB	115	8.75	7.55406	0	8.50221	0	9.92569	1.17569	1
PROB	112	PROB	116	8.25	6.56305	0	6.76981	0	6.71463	0	1
PROB	113	PROB	117	8.25	6.49058	0	6.84547	0	7.77155	0	1
PROB	114	PROB	118	8.25	6.64085	0	6.55696	0	8.59056	0.340555	1
PROB	115	PROB	119	8.25	5.86036	0	5.95357	0	7.20031	0	1
PROB	116	PROB	120	8.25	6.02363	0	6.26964	0	9.82008	1.57008	1
PROB	117	PROB	121	8.25	6.14265	0	6.40928	0	5.90613	0	1
PROB	118	PROB	122	8.25	5.9223	0	6.18199	0	4.16724	0	1
PROB	119	PROB	123	8.25	5.90001	0	6.08087	0	5.74536	0	1
PROB	120	PROB	124	8.25	6.28542	0	6.59731	0	4.78549	0	1
PROB	121	PROB	125	8.25	6.27956	0	6.41345	0	8.37424	0.124242	1
PROB	122	PROB	126	8.25	5.7789	0	5.72691	0	7.64954	0	1
PROB	123	PROB	127	8.25	5.91275	0	6.07865	0	5.20621	0	1
PROB	124	PROB	128	8.25	6.42212	0	6.82471	0	7.48698	0	1
PROB	124	PROB	183	9.25	8.31373	0	5.77184	0	5.32597	0	1
PROB	124	PROB	184	11.75	8.59874	0	8.40436	0	8.14702	0	1
PROB	124	PROB	187	11.75	9.6521	0	7.60849	0	6.82617	0	1
PROB	125	PROB	129	8.25	6.34174	0	6.35916	0	6.08962	0	1
PROB	126	PROB	130	8.25	5.97588	0	5.75631	0	4.35892	0	1
PROB	127	PROB	131	8.25	6.2553	0	6.33424	0	7.28461	0	1
PROB	127	PROB	170	11.75	12.1877	0.437698	10.4255	0	11.0153	0	1
PROB	128	PROB	132	12.75	7.17226	0	8.90121	0	9.23183	0	1
PROB	128	PROB	133	12.25	9.06935	0	9.0014	0	7.98839	0	1
PROB	128	PROB	135	12.75	8.48859	0	8.8376	0	8.76004	0	1
PROB	128	PROB	136	11.25	7.25742	0	6.03145	0	5.58796	0	1
PROB	128	PROB	137	11.75	8.33975	0	8.69618	0	8.09884	0	1
PROB	128	PROB	138	11.75	8.47474	0	9.16992	0	9.43668	0	1
PROB	128	PROB	170	11.25	11.04	0	9.95349	0	8.83621	0	1
PROB	128	PROB	183	11.75	10.6396	0	9.33777	0	9.22774	0	1
PROB	128	PROB	184	11.75	9.43754	0	9.64039	0	9.32888	0	1
PROB	128	PROB	187	8.75	8.12735	0	5.86755	0	5.24903	0	1
PROB	129	PROB	135	12.75	7.5862	0	9.44794	0	9.68123	0	1
PROB	129	PROB	136	7.75	6.0612	0	5.77489	0	5.42817	0	1
PROB	129	PROB	137	7.75	5.55147	0	5.18025	0	3.65726	0	1
PROB	129	PROB	138	7.75	5.49928	0	5.94193	0	6.7257	0	1
PROB	129	PROB	139	12.75	8.30612	0	9.07954	0	9.5984	0	1
PROB	130	PROB	136	12.75	9.26383	0	10.3435	0	11.5032	0	1
PROB	130	PROB	137	12.75	7.93805	0	9.2137	0	8.03522	0	1
PROB	130	PROB	138	11.75	5.79017	0	7.14239	0	7.44554	0	1
PROB	130	PROB	141	17.75	10.6955	0	10.6392	0	9.98451	0	1
PROB	131	PROB	135	10.75	9.2084	0	11.1916	0.441632	12.2265	1.47653	1
PROB	131	PROB	136	11.75	9.52271	0	10.5304	0	12.0912	0.34117	1
PROB	131	PROB	137	11.75	9.00503	0	10.9283	0	11.2267	0	1
PROB	131	PROB	138	11.75	6.87343	0	8.34071	0	9.40041	0	1
PROB	131	PROB	163	11.25	10.096	0	10.7491	0	12.7432	1.4932	1
PROB	131	PROB	166	9.25	9.04349	0	7.28673	0	5.89954	0	1
PROB	131	PROB	167	11.75	10.0346	0	10.1346	0	10.7267	0	1
PROB	131	PROB	170	9.25	10.164	0.913959	7.79599	0	6.6692	0	1
PROB	132	PROB	136	8.25	7.65891	0	8.6757	0.425704	10.5063	2.25631	1
PROB	132	PROB	137	11.25	6.8213	0	7.30161	0	7.88767	0	1
PROB	132	PROB	138	11.25	4.80662	0	3.65045	0	4.24269	0	1
PROB	132	PROB	139	10.75	4.61928	0	3.70521	0	4.80609	0	1
PROB	132	PROB	140	11.25	8.13567	0	8.14402	0	10.5851	0	1
PROB	132	PROB	163	10.75	7.64631	0	8.44685	0	9.85357	0	1
PROB	132	PROB	166	11.25	8.54754	0	8.24989	0	7.53221	0	1
PROB	133	PROB	137	14.75	8.00837	0	10.1199	0	10.2772	0	1
PROB	133	PROB	138	13.25	7.29026	0	8.35397	0	8.60768	0	1
PROB	133	PROB	139	10.75	5.0693	0	6.41306	0	7.02341	0	1
PROB	133	PROB	140	11.75	8.30325	0	10.3874	0	11.1589	0	1
PROB	133	PROB	159	8.25	7.45791	0	8.24041	0	10.0711	1.82109	1
PROB	133	PROB	160	11.25	7.35895	0	8.67338	0	9.47006	0	1
PROB	133	PROB	162	7.25	6.45944	0	6.98371	0	8.07901	0.829006	1
PROB	133	PROB	163	6.25	4.24449	0	3.75922	0	5.01643	0	1
PROB	133	PROB	164	11.75	7.54522	0	7.75079	0	8.52016	0	1
PROB	133	PROB	166	7.25	6.84673	0	5.13413	0	6.0453	0	1
PROB	133	PROB	167	10.75	7.46881	0	5.92035	0	4.66627	0	1
PROB	133	PROB	170	12.25	10.7542	0	8.37329	0	7.11932	0	1
PROB	133	PROB	187	11.75	12.0121	0.262077	10.7526	0	10.7881	0	1
PROB	133	PROB	188	11.75	9.94066	0	8.80734	0	8.25052	0	1
PROB	133	PROB	191	8.25	8.66166	0.411656	6.22644	0	5.87195	0	1
PROB	133	PROB	195	11.75	8.98594	0	6.97623	0	5.71937	0	1
PROB	134	PROB	138	10.75	7.09331	0	8.44318	0	8.77921	0	1
PROB	134	PROB	139	7.25	3.9184	0	5.13346	0	5.82093	0	1
PROB	134	PROB	140	7.25	5.63763	0	6.88907	0	5.14474	0	1
PROB	134	PROB	142	11.75	7.49256	0	7.30913	0	8.91771	0	1
PROB	134	PROB	143	8.75	7.13703	0	6.13957	0	5.32246	0	1
PROB	134	PROB	156	10.75	8.45573	0	7.35053	0	4.95516	0	1
PROB	134	PROB	159	7.75	6.3606	0	4.93087	0	6.468	0	1
PROB	134	PROB	160	11.75	6.63959	0	6.52484	0	7.5219	0	1
PROB	134	PROB	162	10.75	8.03143	0	8.01591	0	10.0948	0	1
PROB	134	PROB	163	8.75	6.04536	0	4.92305	0	7.89919	0	1
PROB	134	PROB	166	11.75	10.2105	0	9.96519	0	14.161	2.41102	1
PROB	134	PROB	191	11.75	8.77261	0	8.14087	0	9.8645	0	1
PROB	135	PROB	139	6.25	5.39361	0	6.73083	0.480829	6.59313	0.34313	1
PROB	135	PROB	140	7.25	6.40633	0	7.31844	0.068438	7.16671	0	1
PROB	135	PROB	141	11.25	9.4882	0	11.1416	0	11.6686	0.418626	1
PROB	135	PROB	142	11.75	9.95861	0	10.5072	0	10.4058	0	1
PROB	135	PROB	143	11.75	9.8341	0	9.50439	0	10.5557	0	1
PROB	135	PROB	159	11.75	10.1077	0	9.64702	0	9.87248	0	1
PROB	135	PROB	163	11.75	8.56014	0	7.67445	0	6.68703	0	1
PROB	136	PROB	140	10.75	7.60066	0	8.29296	0	8.26701	0	1
PROB	136	PROB	141	11.75	10.4044	0	11.2719	0	12.319	0.569018	1
PROB	136	PROB	163	12.75	11.2016	0	11.5529	0	12.3243	0	1
PROB	137	PROB	141	8.75	7.08265	0	7.25271	0	7.01712	0	1
PROB	138	PROB	142	8.25	6.89467	0	6.77345	0	6.45348	0	1
PROB	138	PROB	159	11.75	11.5757	0	10.5831	0	10.3877	0	1
PROB	139	PROB	143	8.25	5.96211	0	5.77839	0	8.09086	0	1
PROB	139	PROB	156	11.25	10.4591	0	11.04	0	9.87525	0	1
PROB	139	PROB	159	7.25	7.83583	0.585829	6.80187	0	6.72329	0	1
PROB	139	PROB	160	11.25	9.58665	0	10.7569	0	10.7173	0	1
PROB	139	PROB	162	11.25	9.35521	0	8.43736	0	8.20802	0	1
PROB	139	PROB	163	10.25	8.50979	0	7.93561	0	8.42105	0	1
PROB	139	PROB	195	12.75	12.0354	0	11.3635	0	10.054	0	1
PROB	140	PROB	144	8.25	6.19384	0	6.51368	0	7.72981	0	1
PROB	140	PROB	159	11.25	9.11608	0	8.94233	0	10.3277	0	1
PROB	140	PROB	194	14.25	14.6852	0.435188	13.666	0	12.0089	0	0	not included in modeling for B/C to allow asymmetric structure
PROB	141	PROB	145	8.25	6.38786	0	6.82984	0	7.34741	0	1
PROB	142	PROB	146	8.25	6.37868	0	6.45262	0	9.50006	1.25006	1
PROB	142	PROB	155	10.25	10.3923	0.142285	9.94966	0	11.2792	1.02917	1
PROB	142	PROB	158	10.25	10.1825	0	9.46921	0	11.5956	1.34561	1
PROB	142	PROB	159	6.75	7.41671	0.666713	5.696	0	5.93309	0	1
PROB	142	PROB	162	8.75	9.73494	0.984943	6.94441	0	6.33732	0	1
PROB	143	PROB	147	8.25	5.66564	0	5.81095	0	4.07183	0	1
PROB	143	PROB	152	10.75	8.80093	0	8.62727	0	5.72154	0	1
PROB	143	PROB	155	7.25	7.41831	0.168306	6.66993	0	4.99489	0	1
PROB	143	PROB	156	9.25	7.11042	0	7.16233	0	5.79905	0	1
PROB	143	PROB	158	10.75	8.72199	0	9.22068	0	9.92118	0	1
PROB	143	PROB	159	7.75	6.33717	0	5.00107	0	5.1865	0	1
PROB	144	PROB	148	8.25	6.48753	0	7.29005	0	9.99924	1.74924	1
PROB	144	PROB	155	10.75	9.49992	0	9.73483	0	10.3161	0	1
PROB	145	PROB	149	8.25	7.51354	0	8.05279	0	8.59431	0.344314	1
PROB	145	PROB	155	10.75	10.1502	0	9.92879	0	11.3181	0.568126	1
PROB	146	PROB	150	7.25	6.32945	0	6.13973	0	5.32075	0	1
PROB	146	PROB	152	10.75	9.13915	0	10.067	0	11.2314	0.481374	1
PROB	146	PROB	154	10.25	10.3638	0.113838	9.79473	0	10.5155	0.265476	1
PROB	146	PROB	155	5.75	6.76246	1.01246	5.25404	0	4.85483	0	1
PROB	146	PROB	158	8.25	8.53046	0.280463	6.21838	0	5.10929	0	1
PROB	146	PROB	159	9.75	8.16065	0	6.27407	0	5.95789	0	1
PROB	147	PROB	151	9.75	6.1479	0	7.92522	0	8.21573	0	1
PROB	147	PROB	152	7.75	6.75658	0	6.96534	0	7.57978	0	1
PROB	147	PROB	154	10.75	9.66928	0	10.5016	0	12.4613	1.71125	1
PROB	147	PROB	155	6.75	6.52393	0	5.62982	0	5.29358	0	1
PROB	149	PROB	155	10.75	8.04285	0	7.21619	0	8.42586	0	1
PROB	150	PROB	154	6.25	6.78674	0.536745	5.24225	0	6.02542	0	1
PROB	150	PROB	155	7.25	5.31067	0	4.24263	0	4.75157	0	1
PROB	150	PROB	158	9.25	9.25547	0.005467	6.84325	0	5.98925	0	1
PROB	151	PROB	155	9.25	5.53919	0	6.07801	0	6.18733	0	1
PROB	152	PROB	156	8.25	5.59303	0	5.95542	0	5.56073	0	1
PROB	152	PROB	202	10.75	6.94255	0	6.72844	0	8.39896	0	1
PROB	152	PROB	205	10.75	10.2805	0	10.3372	0	9.93344	0	1
PROB	152	PROB	206	11.75	7.93536	0	6.52076	0	6.29713	0	1
PROB	152	PROB	209	11.75	9.19578	0	8.80529	0	7.58757	0	1
PROB	153	PROB	157	8.25	7.25691	0	7.89605	0	11.3964	3.14644	1
PROB	153	PROB	202	8.25	4.29094	0	4.30256	0	6.29978	0	1
PROB	153	PROB	203	9.25	5.29619	0	5.54352	0	5.67607	0	1
PROB	153	PROB	205	10.25	8.82261	0	9.43217	0	10.8553	0.605295	1
PROB	153	PROB	206	8.25	7.55604	0	7.74418	0	10.7831	2.53314	1
PROB	153	PROB	207	12.75	5.46459	0	3.909	0	4.25023	0	1
PROB	153	PROB	209	12.75	10.2924	0	11.3879	0	12.0405	0	1
PROB	154	PROB	158	8.25	7.05371	0	7.36988	0	8.49538	0.245384	1
PROB	155	PROB	159	8.25	6.56171	0	6.62325	0	6.06765	0	1
PROB	156	PROB	160	8.25	6.08255	0	6.16013	0	4.64802	0	1
PROB	156	PROB	198	10.25	8.03184	0	6.35421	0	4.99652	0	1
PROB	156	PROB	199	10.75	7.35438	0	7.5397	0	10.1239	0	1
PROB	156	PROB	202	7.75	6.37278	0	3.90667	0	6.70092	0	1
PROB	156	PROB	205	11.75	12.4643	0.714269	11.7255	0	10.97	0	1
PROB	157	PROB	161	8.25	6.13099	0	6.58646	0	4.39885	0	1
PROB	157	PROB	199	8.75	5.94906	0	5.94435	0	6.29764	0	1
PROB	157	PROB	202	8.25	7.5883	0	6.20262	0	5.51639	0	1
PROB	157	PROB	203	10.75	9.73763	0	9.41628	0	8.50704	0	1
PROB	158	PROB	162	8.25	6.79545	0	7.35163	0	8.23839	0	1
PROB	159	PROB	163	8.25	6.26767	0	6.25138	0	7.55579	0	1
PROB	160	PROB	164	8.25	6.19969	0	5.81103	0	5.62955	0	1
PROB	160	PROB	195	6.75	6.38108	0	5.59671	0	5.44742	0	1
PROB	160	PROB	196	10.75	8.03339	0	8.25517	0	8.34373	0	1
PROB	160	PROB	198	7.75	7.79773	0.047726	5.88103	0	5.16608	0	1
PROB	160	PROB	199	6.75	7.0405	0.290504	5.21494	0	7.25252	0.502524	1
PROB	160	PROB	202	9.25	10.2268	0.976776	7.8894	0	6.90192	0	1
PROB	161	PROB	165	8.25	6.41944	0	6.43823	0	7.77239	0	1
PROB	161	PROB	195	10.75	9.00375	0	9.60342	0	11.5087	0.75869	1
PROB	161	PROB	199	10.75	9.1841	0	8.84203	0	10.2055	0	1
PROB	162	PROB	166	8.25	6.30202	0	6.34758	0	8.59007	0.340071	1
PROB	163	PROB	167	8.25	6.03626	0	6.09605	0	5.68378	0	1
PROB	163	PROB	191	10.25	9.26053	0	7.7003	0	8.72757	0	1
PROB	163	PROB	192	11.25	7.85526	0	7.9421	0	7.81743	0	1
PROB	163	PROB	194	11.25	10.4606	0	9.26266	0	9.03991	0	1
PROB	163	PROB	195	7.25	7.13154	0	4.75291	0	3.52068	0	1
PROB	163	PROB	198	10.75	10.7756	0.025636	8.28148	0	7.28448	0	1
PROB	164	PROB	168	8.25	5.81769	0	6.37018	0	8.28487	0.034874	1
PROB	164	PROB	191	10.75	9.17533	0	10.0074	0	11.1529	0.402947	1
PROB	164	PROB	192	8.75	6.34608	0	7.20648	0	7.10618	0	1
PROB	164	PROB	195	6.75	6.48915	0	5.20504	0	5.00194	0	1
PROB	164	PROB	196	9.25	7.43588	0	7.16807	0	4.60417	0	1
PROB	164	PROB	199	9.75	10.5469	0.796859	8.57355	0	8.03498	0	1
PROB	165	PROB	169	8.25	6.27481	0	6.84619	0	6.86808	0	1
PROB	166	PROB	170	8.25	6.24756	0	6.26502	0	4.51643	0	1
PROB	166	PROB	191	10.75	11.2196	0.4696	9.93148	0	11.0349	0.284926	1
PROB	167	PROB	171	8.25	5.88026	0	6.4804	0	7.10655	0	1
PROB	167	PROB	188	6.75	6.34097	0	5.58017	0	6.89742	0.147422	1
PROB	167	PROB	189	10.25	7.93222	0	8.14306	0	8.53451	0	1
PROB	167	PROB	191	7.25	8.35566	1.10566	6.69909	0	7.10726	0	1
PROB	167	PROB	192	6.25	6.28316	0.033159	4.15579	0	4.155	0	1
PROB	167	PROB	195	8.75	9.23047	0.480466	6.35819	0	5.3145	0	1
PROB	168	PROB	172	8.25	5.81391	0	5.91933	0	4.8643	0	1
PROB	168	PROB	188	9.75	8.82273	0	9.23125	0	11.1333	1.38334	1
PROB	168	PROB	192	9.25	8.41959	0	8.07465	0	8.85171	0	1
PROB	169	PROB	173	8.25	6.18684	0	6.56632	0	10.4335	2.18348	1
PROB	170	PROB	174	8.25	6.35336	0	6.66236	0	7.73649	0	1
PROB	170	PROB	184	10.25	8.48583	0	7.61047	0	7.88234	0	1
PROB	170	PROB	185	10.75	8.6345	0	9.44684	0	10.4795	0	1
PROB	170	PROB	187	10.75	9.98722	0	8.65808	0	9.8347	0	1
PROB	170	PROB	188	6.75	6.99485	0.244853	4.63341	0	4.06798	0	1
PROB	170	PROB	191	10.25	11.4327	1.18271	9.34255	0	9.75581	0	1
PROB	171	PROB	175	8.25	6.11744	0	5.81404	0	5.67623	0	1
PROB	171	PROB	184	10.75	8.04015	0	7.80596	0	7.80596	0	1
PROB	171	PROB	185	7.75	6.54349	0	7.11544	0	5.88229	0	1
PROB	171	PROB	188	6.25	6.274	0.024001	4.81199	0	5.32121	0	1
PROB	171	PROB	189	9.25	7.42417	0	7.53415	0	7.33185	0	1
PROB	171	PROB	192	8.75	9.05979	0.309786	7.67767	0	7.67767	0	1
PROB	172	PROB	176	8.25	5.79883	0	5.86588	0	8.42471	0.174714	1
PROB	173	PROB	177	8.25	5.66798	0	5.64504	0	4.21393	0	1
PROB	173	PROB	178	11.25	7.97948	0	9.62665	0	8.99477	0	1
PROB	173	PROB	184	11.25	9.57437	0	8.20182	0	7.78338	0	1
PROB	174	PROB	178	7.75	5.40667	0	6.6049	0	6.45643	0	1
PROB	174	PROB	179	11.75	8.00018	0	8.81274	0	7.42236	0	1
PROB	174	PROB	180	10.75	9.03975	0	10.2484	0	10.0315	0	1
PROB	174	PROB	181	7.25	8.27912	1.02912	6.70464	0	6.15437	0	1
PROB	174	PROB	182	11.25	9.52651	0	9.92476	0	10.1409	0	1
PROB	174	PROB	184	6.25	6.85836	0.608364	4.87389	0	4.33171	0	1
PROB	174	PROB	185	6.75	6.41742	0	5.12378	0	5.56086	0	1
PROB	174	PROB	187	10.75	10.8264	0.076427	9.3344	0	9.85288	0	1
PROB	174	PROB	188	8.75	9.23755	0.487547	6.6264	0	5.75684	0	1
PROB	175	PROB	179	12.75	9.41492	0	11.7953	0	11.3965	0	1
PROB	175	PROB	180	12.25	9.99514	0	12.2015	0	12.0493	0	1
PROB	175	PROB	181	10.75	10.2418	0	10.8939	0.14387	11.4101	0.660094	1
PROB	175	PROB	184	11.25	9.84292	0	10.0517	0	9.97462	0	1
PROB	175	PROB	185	9.25	8.07248	0	7.83984	0	5.11275	0	1
PROB	177	PROB	181	10.75	9.94988	0	9.51293	0	8.94178	0	1
PROB	177	PROB	184	10.75	11.0136	0.263638	9.69313	0	10.1087	0	1
PROB	178	PROB	182	11.25	9.24973	0	10.1995	0	10.2639	0	1
PROB	178	PROB	184	10.25	9.41943	0	9.05064	0	9.16605	0	1
PROB	178	PROB	185	10.75	9.27136	0	8.38333	0	8.4819	0	1
PROB	180	PROB	184	10.25	9.2666	0	9.86583	0	10.0055	0	1
PROB	180	PROB	185	10.75	9.66177	0	9.62499	0	11.0823	0.332311	1
PROB	181	PROB	185	8.25	7.10041	0	6.47526	0	10.1648	1.91478	1
PROB	183	PROB	187	8.25	5.75932	0	5.6773	0	5.33902	0	1
PROB	184	PROB	188	8.25	6.36899	0	6.60597	0	4.92742	0	1
PROB	185	PROB	189	8.25	6.36827	0	6.33303	0	4.49891	0	1
PROB	187	PROB	191	8.25	6.53824	0	6.96349	0	7.20115	0	1
PROB	188	PROB	192	8.25	5.90441	0	5.6939	0	8.0167	0	1
PROB	189	PROB	193	8.25	5.6679	0	5.92868	0	6.4656	0	1
PROB	191	PROB	195	8.25	6.43984	0	6.43545	0	6.61654	0	1
PROB	192	PROB	196	8.25	6.63129	0	7.20663	0	6.12441	0	1
PROB	193	PROB	197	8.25	6.76478	0	6.87849	0	6.31988	0	1
PROB	194	PROB	198	8.25	5.9571	0	5.77338	0	4.19124	0	1
PROB	195	PROB	199	8.25	6.73475	0	7.53711	0	9.83363	1.58363	1
PROB	196	PROB	200	8.25	7.68473	0	8.07532	0	12.659	4.40896	1
PROB	197	PROB	201	8.25	6.44446	0	6.28259	0	8.42878	0.178779	1
PROB	198	PROB	202	8.25	6.04818	0	6.26843	0	9.3131	1.0631	1
PROB	199	PROB	203	8.25	7.69289	0	8.31988	0.069876	8.04096	0	1
PROB	200	PROB	204	8.25	7.79367	0	7.93067	0	5.78806	0	1
PROB	201	PROB	205	8.25	7.27819	0	7.28409	0	6.04186	0	1
PROB	202	PROB	206	8.25	6.04937	0	6.67983	0	10.5237	2.27366	1
PROB	203	PROB	207	8.25	6.88365	0	7.148	0	8.22039	0	1
PROB	204	PROB	208	8.25	7.00444	0	7.61248	0	7.6692	0	1
PROB	206	PROB	210	8.25	6.34755	0	5.72953	0	7.29043	0	1
PROB	207	PROB	211	8.25	6.92271	0	7.45522	0	8.65882	0.40882	1
PROB	208	PROB	212	8.25	7.58598	0	7.87896	0	10.3216	2.07156	1
PROB	209	PROB	213	8.25	8.15852	0	8.36616	0.116159	8.25991	0.009909	1
PROB	210	PROB	214	8.25	7.71005	0	7.73135	0	10.0739	1.82394	1
PROB	211	PROB	215	8.25	6.72166	0	7.58689	0	10.2332	1.98317	1
PROB	211	PROB	216	11.75	7.44322	0	7.23815	0	7.88521	0	1
PROB	211	PROB	217	12.75	10.195	0	9.93516	0	10.3685	0	1
PROB	211	PROB	218	12.75	12.1649	0	13.1046	0.354569	14.9387	2.18866	1
PROB	211	PROB	221	12.75	10.8794	0	13.3072	0.557152	14.8687	2.11866	1
PROB	212	PROB	216	8.25	6.80707	0	7.98418	0	7.76776	0	1
PROB	212	PROB	217	11.75	8.26981	0	7.92087	0	5.69273	0	1
PROB	212	PROB	218	12.75	10.2077	0	11.0512	0	11.7074	0	1
PROB	213	PROB	217	9.75	9.64613	0	10.3841	0.634112	12.2853	2.53532	1
PROB	213	PROB	218	11.75	10.2453	0	11.6359	0	15.5086	3.75863	1
PROB	214	PROB	218	11.75	10.1784	0	11.8682	0.118212	14.5522	2.80222	1
PROB	214	PROB	219	11.75	8.84705	0	10.8817	0	12.0886	0.338615	1
PROB	214	PROB	220	12.75	6.18974	0	8.58706	0	9.51283	0	1
PROB	214	PROB	221	11.75	7.51625	0	10.451	0	11.8706	0.120604	1
PROB	215	PROB	219	8.25	5.84087	0	6.92282	0	5.45629	0	1
PROB	215	PROB	220	11.75	4.59106	0	6.20587	0	6.08344	0	1
PROB	215	PROB	221	12.75	7.17533	0	9.57752	0	10.1845	0	1
PROB	216	PROB	220	11.25	6.48709	0	7.96162	0	9.41058	0	1
PROB	216	PROB	221	11.75	7.96715	0	9.38701	0	10.4732	0	1
PROB	217	PROB	221	10.75	8.35889	0	8.938	0	11.5717	0.82175	1
PROB	218	PROB	222	8.25	5.0325	0	5.08342	0	6.6589	0	1
PROB	219	PROB	223	12.75	9.85048	0	11.5722	0	13.9601	1.21013	1
PROB	219	PROB	224	12.75	11.0846	0	13.2701	0.520072	15.6226	2.87261	1
PROB	220	PROB	224	13.75	10.6162	0	11.994	0	13.0063	0	1
PROB	222	PROB	247	12.75	13.7247	0.974673	12.523	0	14.7623	2.01225	1
PROB	223	PROB	245	14.25	11.749	0	11.169	0	13.4597	0	1
PROB	223	PROB	246	12.75	9.49905	0	8.75168	0	10.841	0	1
PROB	223	PROB	247	10.75	11.2979	0.547921	11.2407	0.490746	10.2643	0	1
PROB	224	PROB	246	11.75	8.14788	0	9.76414	0	11.7232	0	1
PROB	224	PROB	247	11.75	8.99325	0	9.12337	0	12.4629	0.712859	1
PROB	224	PROB	248	10.75	10.7185	0	10.6458	0	11.5071	0.757072	1
PROB	224	PROB	249	10.75	10.8224	0.072352	9.52843	0	10.0056	0	1
PROB	225	PROB	245	12.75	6.31004	0	5.86499	0	5.29412	0	1
PROB	225	PROB	246	7.75	4.82396	0	6.45169	0	7.25788	0	1
PROB	225	PROB	247	9.25	5.24913	0	3.89579	0	6.05042	0	1
PROB	225	PROB	248	7.25	7.54081	0.290813	7.22921	0	7.22813	0	1
PROB	225	PROB	249	9.25	8.43713	0	8.21711	0	8.5528	0	1
PROB	226	PROB	246	12.75	4.2664	0	5.25018	0	5.17576	0	1
PROB	226	PROB	247	11.75	5.53365	0	7.55907	0	9.50841	0	1
PROB	226	PROB	248	8.75	6.6098	0	8.78442	0.034416	9.69655	0.946552	1
PROB	226	PROB	249	6.75	5.87855	0	6.30142	0	6.83937	0.089374	1
PROB	227	PROB	238	10.75	9.70659	0	10.248	0	11.4496	0.699568	1
PROB	227	PROB	241	7.75	7.12504	0	7.14494	0	6.8332	0	1
PROB	227	PROB	242	10.25	8.30478	0	10.6629	0.412884	11.6429	1.39291	1
PROB	227	PROB	246	11.25	4.23351	0	4.95632	0	6.11201	0	1
PROB	227	PROB	247	12.75	6.28179	0	8.81274	0	11.8834	0	1
PROB	227	PROB	248	7.25	7.00389	0	8.88245	1.63245	11.3647	4.11469	1
PROB	227	PROB	249	9.25	5.54917	0	5.48332	0	7.16364	0	1
PROB	227	PROB	250	6.75	5.6574	0	7.13499	0.384985	8.64636	1.89636	1
PROB	227	PROB	251	9.25	7.71836	0	7.28595	0	9.01257	0	1
PROB	228	PROB	250	9.75	4.63815	0	4.60285	0	4.54084	0	1
PROB	228	PROB	251	6.75	6.78648	0.036477	6.40929	0	6.96118	0.211181	1
PROB	228	PROB	252	9.75	7.025	0	7.07782	0	6.58373	0	1
PROB	228	PROB	253	8.25	6.15211	0	5.11045	0	5.77714	0	1
PROB	228	PROB	256	11.75	10.3018	0	9.41819	0	9.05797	0	1
PROB	229	PROB	233	7.25	7.0907	0	4.68878	0	4.33463	0	1
PROB	229	PROB	235	11.75	9.36318	0	9.1028	0	9.15986	0	1
PROB	229	PROB	237	10.25	7.38334	0	5.33773	0	6.39018	0	1
PROB	229	PROB	238	8.25	6.5634	0	5.51619	0	5.32375	0	1
PROB	229	PROB	241	10.25	7.34122	0	5.7643	0	6.61304	0	1
PROB	229	PROB	250	7.75	7.38106	0	7.46211	0	7.00587	0	1
PROB	229	PROB	251	9.25	9.02325	0	10.0905	0.840543	11.0534	1.80336	1
PROB	229	PROB	252	7.25	7.82144	0.571435	8.31684	1.06684	8.32436	1.07436	1
PROB	229	PROB	253	9.25	7.22084	0	8.16553	0	10.0522	0.802217	1
PROB	229	PROB	262	10.75	12.3818	1.63181	10.0327	0	9.88787	0	1
PROB	229	PROB	281	7.25	9.99368	2.74368	9.50984	2.25984	11.5135	4.26351	1
PROB	230	PROB	252	9.75	7.08489	0	8.78136	0	9.18388	0	1
PROB	230	PROB	281	9.25	7.81363	0	9.14105	0	11.6709	2.42091	1
PROB	231	PROB	252	7.25	5.53928	0	5.02332	0	5.12164	0	1
PROB	231	PROB	253	8.75	6.13796	0	7.42045	0	9.06865	0.31865	1
PROB	231	PROB	255	10.75	7.5181	0	6.07741	0	5.39616	0	1
PROB	231	PROB	259	7.75	10.7825	3.03254	8.62523	0.875235	8.38544	0.635442	1
PROB	231	PROB	260	10.75	11.4191	0.669137	10.5201	0	9.89152	0	1
PROB	231	PROB	280	10.25	8.52675	0	9.74216	0	10.1822	0	1
PROB	231	PROB	281	7.75	5.55842	0	7.09172	0	8.47058	0.720576	1
PROB	231	PROB	282	7.25	4.32791	0	5.1785	0	5.49589	0	1
PROB	231	PROB	285	10.75	9.82259	0	9.22548	0	7.76978	0	1
PROB	232	PROB	280	7.75	5.72816	0	6.10323	0	7.76253	0.012526	1
PROB	232	PROB	281	9.75	4.35955	0	7.19428	0	9.82797	0.077971	1
PROB	232	PROB	282	9.25	4.93784	0	7.18149	0	9.63132	0.381319	1
PROB	233	PROB	237	6.25	7.74323	1.49323	5.59358	0	5.0715	0	1
PROB	233	PROB	238	7.25	8.51744	1.26744	7.07112	0	6.63178	0	1
PROB	233	PROB	252	11.25	9.85282	0	9.09602	0	9.58863	0	1
PROB	233	PROB	280	8.75	5.46545	0	6.93779	0	7.45272	0	1
PROB	233	PROB	281	7.25	5.13905	0	6.80961	0	9.90212	2.65212	1
PROB	234	PROB	238	9.25	8.10912	0	8.92952	0	10.8241	1.57409	1
PROB	234	PROB	276	11.25	8.42206	0	8.76086	0	11.8469	0.596863	1
PROB	234	PROB	277	8.75	6.28646	0	7.14372	0	6.98449	0	1
PROB	234	PROB	278	7.75	5.80972	0	7.44937	0	6.45447	0	1
PROB	234	PROB	279	8.75	5.91321	0	6.69784	0	7.66201	0	1
PROB	234	PROB	280	7.75	5.45236	0	6.64843	0	4.83276	0	1
PROB	234	PROB	281	9.25	6.74113	0	9.00872	0	10.7764	1.52636	1
PROB	235	PROB	239	8.25	7.56609	0	7.80031	0	8.48349	0.233494	1
PROB	235	PROB	262	10.25	10.454	0.204001	8.63812	0	7.42768	0	1
PROB	235	PROB	267	8.25	7.99492	0	7.15239	0	6.82371	0	1
PROB	235	PROB	270	7.75	8.19659	0.446592	5.54856	0	4.96253	0	1
PROB	235	PROB	271	8.25	8.21279	0	7.77754	0	8.35652	0.106524	1
PROB	235	PROB	275	10.75	7.64763	0	7.01903	0	8.15943	0	1
PROB	235	PROB	276	7.25	6.94052	0	5.04284	0	6.46568	0	1
PROB	235	PROB	277	8.25	6.67459	0	7.88344	0	8.20931	0	1
PROB	235	PROB	278	9.75	7.22834	0	8.21013	0	9.50762	0	1
PROB	235	PROB	279	7.25	5.66179	0	3.47366	0	3.52066	0	1
PROB	235	PROB	280	9.25	6.83459	0	7.94154	0	8.23688	0	1
PROB	235	PROB	281	7.25	6.94022	0	6.69316	0	7.98757	0.737567	1
PROB	235	PROB	283	10.75	4.11005	0	4.25955	0	6.23569	0	1
PROB	235	PROB	284	8.25	7.12204	0	6.31576	0	5.7074	0	1
PROB	236	PROB	240	8.25	7.46211	0	7.56798	0	9.38275	1.13275	1
PROB	236	PROB	271	10.75	6.13578	0	6.0803	0	7.23147	0	1
PROB	236	PROB	276	10.75	7.22841	0	7.5561	0	9.80846	0	1
PROB	236	PROB	277	7.25	6.82021	0	7.39116	0.141161	5.1448	0	1
PROB	236	PROB	278	9.75	9.00043	0	10.4232	0.673188	8.42198	0	1
PROB	237	PROB	281	10.75	10.769	0.018993	10.8053	0.055331	13.9614	3.21136	1
PROB	238	PROB	242	8.25	6.62047	0	6.96637	0	5.98488	0	1
PROB	238	PROB	248	11.75	10.5443	0	11.7329	0	13.8576	2.10756	1
PROB	238	PROB	250	8.25	6.59456	0	5.26466	0	4.83422	0	1
PROB	238	PROB	252	11.75	9.4921	0	9.00007	0	8.11743	0	1
PROB	238	PROB	262	9.25	8.54942	0	5.85767	0	5.13309	0	1
PROB	238	PROB	267	8.75	7.14908	0	5.36337	0	5.34142	0	1
PROB	238	PROB	281	8.75	10.0828	1.33279	8.82665	0.076652	9.78854	1.03854	1
PROB	238	PROB	284	10.75	9.81021	0	8.87292	0	8.8625	0	1
PROB	239	PROB	243	8.25	7.41255	0	7.78268	0	8.5754	0.325395	1
PROB	239	PROB	264	10.75	7.46746	0	9.08204	0	9.37257	0	1
PROB	239	PROB	267	8.25	5.99654	0	4.81443	0	4.00909	0	1
PROB	239	PROB	268	9.25	7.63901	0	7.81371	0	7.64913	0	1
PROB	239	PROB	271	8.75	7.83975	0	5.21277	0	5.04042	0	1
PROB	239	PROB	276	10.75	11.8647	1.1147	10.5131	0	12.1911	1.44107	1
PROB	239	PROB	277	12.25	12.4611	0.211138	12.6446	0.394564	13.4383	1.18826	1
PROB	241	PROB	245	10.25	7.25081	0	7.89644	0	7.04438	0	1
PROB	241	PROB	246	6.25	6.43232	0.182324	5.60567	0	4.66237	0	1
PROB	241	PROB	247	11.25	6.96722	0	8.61006	0	7.75485	0	1
PROB	241	PROB	248	10.25	8.02946	0	9.36295	0	8.92314	0	1
PROB	241	PROB	250	11.25	6.93129	0	5.76745	0	4.90791	0	1
PROB	242	PROB	246	8.25	7.20301	0	8.98923	0.739229	10.2417	1.99169	1
PROB	242	PROB	247	9.75	5.77598	0	8.00592	0	8.44809	0	1
PROB	242	PROB	248	8.75	5.70107	0	7.47375	0	8.37806	0	1
PROB	242	PROB	250	10.75	6.51483	0	5.97183	0	3.97499	0	1
PROB	242	PROB	264	8.25	5.97434	0	4.59935	0	4.80034	0	1
PROB	242	PROB	267	9.25	9.25776	0.007758	6.69402	0	5.15128	0	1
PROB	242	PROB	268	11.75	11.1425	0	9.61849	0	9.55936	0	1
PROB	243	PROB	264	11.75	7.89663	0	7.5673	0	8.36122	0	1
PROB	246	PROB	264	11.25	12.3228	1.07277	12.436	1.18599	11.6627	0.412722	1
PROB	247	PROB	264	9.25	9.89374	0.64374	9.52879	0.278791	5.99102	0	1
PROB	248	PROB	264	7.25	7.4928	0.242798	7.07679	0	5.87472	0	1
PROB	250	PROB	261	9.25	7.83526	0	7.93078	0	9.35145	0.101449	1
PROB	250	PROB	262	7.25	6.75085	0	5.02898	0	5.32512	0	1
PROB	250	PROB	263	9.75	7.64271	0	7.85324	0	8.63126	0	1
PROB	250	PROB	264	9.25	8.33092	0	7.60308	0	7.87813	0	1
PROB	250	PROB	266	10.75	11.112	0.361978	9.29841	0	10.9867	0.236726	1
PROB	250	PROB	267	8.75	10.0713	1.32126	7.61105	0	7.19854	0	1
PROB	250	PROB	281	11.25	11.9685	0.718468	11.4116	0.161557	12.1965	0.946487	1
PROB	250	PROB	284	11.25	11.4221	0.172145	11.1497	0	11.6562	0.406206	1
PROB	250	PROB	285	11.25	10.3135	0	10.7894	0	10.3636	0	1
PROB	251	PROB	259	10.25	6.56347	0	6.09486	0	7.63606	0	1
PROB	251	PROB	260	9.25	6.3581	0	7.06252	0	6.45137	0	1
PROB	251	PROB	261	7.25	5.75704	0	6.34083	0	7.32188	0.071883	1
PROB	251	PROB	262	9.75	6.49367	0	7.22369	0	8.16984	0	1
PROB	252	PROB	259	7.25	6.39561	0	4.88087	0	5.87401	0	1
PROB	252	PROB	260	6.25	6.90722	0.657224	6.1026	0	5.37901	0	1
PROB	252	PROB	261	9.75	7.70837	0	9.07029	0	10.1747	0.424717	1
PROB	252	PROB	262	8.25	8.48701	0.237008	8.0437	0	8.2162	0	1
PROB	252	PROB	281	7.25	8.2791	1.0291	7.02348	0	7.12114	0	1
PROB	252	PROB	282	10.75	6.18874	0	4.69786	0	4.26424	0	1
PROB	252	PROB	284	10.75	9.57388	0	10.0661	0	10.386	0	1
PROB	252	PROB	285	7.75	7.50067	0	6.18277	0	4.43704	0	1
PROB	253	PROB	257	8.25	5.02028	0	5.27173	0	4.83465	0	1
PROB	253	PROB	259	8.25	8.2019	0	7.62346	0	8.55063	0.300628	1
PROB	253	PROB	281	11.75	10.765	0	12.1024	0.352424	14.4121	2.66206	1
PROB	258	PROB	288	12.75	10.4113	0	10.9978	0	13.7819	1.03194	1
PROB	259	PROB	281	10.75	12.4888	1.73881	10.6372	0	10.2576	0	1
PROB	259	PROB	282	9.75	11.7695	2.01954	9.53928	0	9.93412	0.184119	1
PROB	259	PROB	285	7.25	8.24159	0.991593	7.26995	0.019953	6.35518	0	1
PROB	259	PROB	288	11.75	8.62389	0	10.3739	0	13.1899	1.43993	1
PROB	260	PROB	281	10.25	11.5663	1.31629	9.27898	0	8.32826	0	1
PROB	260	PROB	282	10.75	11.0133	0.263267	9.50847	0	9.26166	0	1
PROB	260	PROB	284	11.25	9.33164	0	8.90606	0	10.0144	0	1
PROB	260	PROB	285	6.25	5.50134	0	4.27201	0	4.11782	0	1
PROB	260	PROB	286	10.75	5.64718	0	5.87212	0	7.36942	0	1
PROB	260	PROB	287	10.25	5.13332	0	5.39773	0	6.17663	0	1
PROB	260	PROB	288	8.25	6.46038	0	7.16538	0	10.689	2.439	1
PROB	261	PROB	285	9.25	5.82159	0	8.27814	0	9.37594	0.125941	1
PROB	261	PROB	286	11.75	5.24834	0	5.53453	0	5.07116	0	1
PROB	261	PROB	287	13.25	6.78085	0	8.77232	0	8.09085	0	1
PROB	261	PROB	288	10.75	7.89658	0	7.04157	0	8.48438	0	1
PROB	262	PROB	266	7.25	5.60808	0	5.04313	0	6.33236	0	1
PROB	262	PROB	267	7.75	6.37515	0	5.62028	0	4.79503	0	1
PROB	262	PROB	270	10.75	11.0326	0.282567	9.37193	0	7.97062	0	1
PROB	262	PROB	281	9.25	11.5313	2.28132	9.28176	0.031757	9.62866	0.378662	1
PROB	262	PROB	284	8.25	7.54914	0	6.78515	0	7.02916	0	1
PROB	262	PROB	285	7.75	6.44306	0	7.49259	0	8.34644	0.59644	1
PROB	262	PROB	286	10.25	6.44076	0	6.6441	0	7.06989	0	1
PROB	263	PROB	267	9.25	6.43362	0	7.30797	0	8.66292	0	1
PROB	263	PROB	285	11.25	10.0729	0	12.2772	1.02724	14.1881	2.93813	1
PROB	263	PROB	286	10.25	9.37908	0	8.42002	0	9.63571	0	1
PROB	264	PROB	268	8.25	7.82871	0	8.26591	0.015912	10.1355	1.88549	1
PROB	265	PROB	269	8.25	7.87	0	7.94912	0	7.88659	0	1
PROB	266	PROB	270	8.25	7.52303	0	7.86877	0	8.70511	0.455106	1
PROB	266	PROB	284	7.75	9.17841	1.42841	7.29897	0	8.45327	0.703272	1
PROB	266	PROB	285	10.75	9.9991	0	10.2124	0	12.0408	1.29085	1
PROB	266	PROB	286	8.75	8.99041	0.240414	6.36063	0	5.20484	0	1
PROB	267	PROB	271	8.25	6.40934	0	5.99003	0	7.59334	0	1
PROB	267	PROB	276	11.75	9.98163	0	9.4315	0	10.2488	0	1
PROB	267	PROB	284	8.25	8.37275	0.122753	8.29157	0.041574	8.76713	0.51713	1
PROB	268	PROB	272	8.25	6.24158	0	6.45173	0	9.08574	0.835745	1
PROB	269	PROB	273	8.25	6.63551	0	6.81623	0	8.62817	0.37817	1
PROB	269	PROB	274	11.75	9.61201	0	11.893	0.143016	14.6228	2.8728	1
PROB	269	PROB	275	10.75	9.21488	0	11.4318	0.681762	14.8132	4.06319	1
PROB	270	PROB	274	8.25	6.94458	0	8.60142	0.351421	9.85151	1.60152	1
PROB	270	PROB	275	6.25	5.79767	0	6.69776	0.44776	8.38935	2.13935	1
PROB	270	PROB	276	7.25	5.6059	0	4.03464	0	4.31721	0	1
PROB	270	PROB	279	8.25	9.41731	1.16731	6.73741	0	6.65575	0	1
PROB	270	PROB	283	10.75	9.34527	0	7.60258	0	8.5375	0	1
PROB	270	PROB	284	7.75	8.92463	1.17463	6.61117	0	5.6339	0	1
PROB	271	PROB	275	8.25	4.50365	0	5.84354	0	4.71978	0	1
PROB	271	PROB	276	7.25	6.53833	0	7.59317	0.343166	10.7166	3.46664	1
PROB	271	PROB	277	11.25	8.70776	0	10.2132	0	9.82322	0	1
PROB	271	PROB	279	11.25	10.9537	0	10.2478	0	11.4715	0.221485	1
PROB	271	PROB	284	11.25	11.4335	0.183473	11.1078	0	12.5429	1.2929	1
PROB	272	PROB	276	10.25	8.6306	0	10.0362	0	12.2763	2.02633	1
PROB	273	PROB	277	11.25	9.78631	0	9.58154	0	9.88883	0	1
PROB	274	PROB	278	10.75	10.476	0	10.459	0	11.3712	0.621198	1
PROB	275	PROB	279	8.25	8.83091	0.58091	8.11581	0	10.2855	2.03548	1
PROB	275	PROB	283	10.75	10.825	0.074972	11.0376	0.287621	14.1276	3.3776	1
PROB	275	PROB	284	11.75	11.7847	0.034696	11.8743	0.124339	12.689	0.938967	1
PROB	276	PROB	283	10.75	9.17441	0	8.4845	0	10.201	0	1
[truncated: 2,305 more rows]
